# Supplementary material for: Fast quantitative urinary proteomic profiling workflow for biomarker discovery in kidney cancer
Source: Clin Proteomics. 2018 Dec 22;15:42. doi: 10.1186/s12014-018-9220-2 (PMC6303996; doi:10.1186/s12014-018-9220-2)
Supplement: Supplementary file 8 — Additional file 8: Table S6. The quantified urinary protein list. [file 12014_2018_9220_MOESM8_ESM.xlsx]

## Sheet: Sheet1
Table S6. The quantified urinary protein list.
PG.ProteinAccessions	PG.ProteinDescriptions	Run[1]-Intensity	Run[2]-Intensity	Run[3]-Intensity	Mean-Intensity	RSD(%)	FDA-approved biomarkers	Reported biomarkers of glomerular and tubular injury
P07911;X6RBG4	Uromodulin	43026144	47579952	47612852	4.6073e+07	5.7272
P02768	Albumin	39910568	33646076	39936400	3.7831e+07	9.5802	+
A6XGL3;E7EQ64;P07477	Protease serine 1;Trypsin-1;Trypsin-1	32895572	37921732	38803188	36540164	8.72172	+
P01042	Kininogen-1	34729096	34391896	35138912	3.47533e+07	1.07643
P02760	Protein AMBP	16844052	13106400	15902179	1.52842e+07	12.7187
A0A0A0MS08;P01857	Ig gamma-1 chain C region (Fragment);Ig gamma-1 chain C region	11993650	13029260	12715239	12579383	4.22122	+
P98160	Basement membrane-specific heparan sulfate proteoglycan core protein	11619266	12268259	13117150	1.23349e+07	6.08973
O00187	Mannan-binding lectin serine protease 2	11010026	11564882	11074808	11216572	2.70474
E9PNW4;E9PR17;P13987	CD59 glycoprotein	13419506	4208286	10927117	9518303	50.0559
P01619	Immunoglobulin kappa variable 3-20	9354224	9047102	9239019	9.21345e+06	1.68395	+
P07998	Ribonuclease pancreatic	7.43427e+06	8459695	8458200	8.11739e+06	7.28804
P04745	Alpha-amylase 1	6.54614e+06	8701697	7906788	7.71821e+06	14.1235	+
D6RBV2;Q12907	Vesicular integral-membrane protein VIP36	7.76898e+06	7.55793e+06	7.75809e+06	7.695e+06	1.54426
P01133	Pro-epidermal growth factor	7587566	7632650	7586529	7.60225e+06	0.346394
P00734	Prothrombin	8225341	6.32031e+06	7204367	7.25001e+06	13.1494
E7EQR8;Q9GZM5	Protein YIPF3	6.89862e+06	5695523	7.92286e+06	6839001	16.3016
P01859	Ig gamma-2 chain C region	6.66014e+06	6198849	7626336	6.82844e+06	10.6682	+
A0A075B6K9;P0CG05	Ig lambda-2 chain C regions (Fragment);Ig lambda-2 chain C regions	6024642	7127351	6892239	6.68141e+06	8.69277
P10153	Non-secretory ribonuclease	6.26398e+06	6340320	6458910	6.3544e+06	1.54579
A0A0A0MRZ8;P04433	Immunoglobulin kappa variable 3D-11;Immunoglobulin kappa variable 3-11	5288370	5.97264e+06	6.91745e+06	6.05948e+06	13.4996	+
P60022	Beta-defensin 1	4.01781e+06	5312085	5.07368e+06	4.80119e+06	14.3469
Q7Z5L0	Vitelline membrane outer layer protein 1 homolog	4.68635e+06	4302892	5.137e+06	4708746	8.86657
P05154	Plasma serine protease inhibitor	4.75377e+06	4363278	4723923	4.61366e+06	4.71094
P0DJD8	Pepsin A-3	4.36877e+06	4769850	4.67523e+06	4.60462e+06	4.55316
P01834	Ig kappa chain C region	4.86272e+06	4285926	4.6083e+06	4585648	6.30366
P05090	Apolipoprotein D	4.32811e+06	4.52182e+06	4.44577e+06	4.4319e+06	2.20221
P04746	Pancreatic alpha-amylase	3733851	4876452	4254113	4.28814e+06	13.3405	+
P10451	Osteopontin	3.91549e+06	4.0428e+06	4.82597e+06	4.26142e+06	11.5699		+
K7EQ86;Q08E86;Q14667	KIAA0100, isoform CRA_a;KIAA0100 protein;Protein KIAA0100	4.46184e+06	3.60757e+06	4312506	4.12731e+06	11.0545
P01833	Polymeric immunoglobulin receptor	3.89313e+06	4.03845e+06	3930861	3.95415e+06	1.90697
Q6EMK4	Vasorin	3.91752e+06	3904731	3798783	3.87368e+06	1.68251
P41222	Prostaglandin-H2 D-isomerase	3.94216e+06	3.55708e+06	3.93163e+06	3.81029e+06	5.75681
P06396	Gelsolin	3679987	3.53077e+06	3.78896e+06	3666572	3.5352
Q16270	Insulin-like growth factor-binding protein 7	3.35033e+06	3.69829e+06	3.71994e+06	3.58952e+06	5.77876
Q9HCU0	Endosialin	3.42014e+06	3.48595e+06	3525730	3.47727e+06	1.53362
P24855	Deoxyribonuclease-1	3.60034e+06	3355632	3.45922e+06	3.47173e+06	3.53811
P25311	Zinc-alpha-2-glycoprotein	3.13736e+06	3.56683e+06	3.52723e+06	3.41047e+06	6.9594
P06870	Kallikrein-1	3493376	2.9444e+06	3.06817e+06	3.16865e+06	9.08751
Q08380	Galectin-3-binding protein	3.12364e+06	2.29078e+06	2882793	2.76574e+06	15.4964
A0A0G2JMB2;P01877	Ig alpha-2 chain C region (Fragment);Ig alpha-2 chain C region	2.76978e+06	2.64428e+06	2598262	2.67077e+06	3.3239	+
A0A0C4DH25	Immunoglobulin kappa variable 3-20	2480461	2833006	2.304e+06	2.53916e+06	10.6075	+
P01009	Alpha-1-antitrypsin	2504455	2.08166e+06	2.61364e+06	2.39992e+06	11.7076	+
P60709;P63261	Actin, cytoplasmic 1;Actin, cytoplasmic 2	2.44549e+06	2.35114e+06	2.33042e+06	2.37568e+06	2.58189
Q5T123;Q9H299	SH3 domain-binding glutamic acid-rich-like protein 3	2.12839e+06	2.42229e+06	2.45641e+06	2.3357e+06	7.72104
P10253	Lysosomal alpha-glucosidase	2314656	2.25569e+06	2.29995e+06	2.2901e+06	1.34015
P05451	Lithostathine-1-alpha	2.09306e+06	2.2651e+06	2.21567e+06	2.19128e+06	4.04236
P10909	Clusterin	2.22438e+06	2197432	2.06565e+06	2.16249e+06	3.92795		+
P02753;Q5VY30	Retinol-binding protein 4;Retinol binding protein 4, plasma, isoform CRA_b	2.35569e+06	2069669	1959478	2.12828e+06	9.60897	+	+
P02765	Alpha-2-HS-glycoprotein	2117001	2.04826e+06	2004010	2.05642e+06	2.7687	+
Q15828	Cystatin-M	2.32603e+06	1.70546e+06	2.12616e+06	2.05255e+06	15.4326
P05155	Plasma protease C1 inhibitor	1.98316e+06	1.93638e+06	2236023	2.05185e+06	7.85639	+
P98164	Low-density lipoprotein receptor-related protein 2	1.98273e+06	2.05917e+06	2024789	2.02223e+06	1.89301
A0A1B0GWE0;Q96N67	Dedicator of cytokinesis protein 7 (Fragment);Dedicator of cytokinesis protein 7	2.02625e+06	1.98438e+06	1.93524e+06	1.98196e+06	2.29831
Q16769	Glutaminyl-peptide cyclotransferase	1.72855e+06	2.05469e+06	2.02108e+06	1.93477e+06	9.27155
P15309	Prostatic acid phosphatase	1.88383e+06	1941475	1.9531e+06	1926137	1.92592	+
P01011	Alpha-1-antichymotrypsin	1949342	1.7652e+06	2.02545e+06	1.91333e+06	6.99358
P01624	Immunoglobulin kappa variable 3-15	1.59569e+06	1.68369e+06	2.29454e+06	1.85798e+06	20.4863	+
F5GWK5;F5H0V7;F5H1Z6;F5H3G8;F5H5A8;F5H8G1;F5H8H3;Q9Y365	PCTP-like protein (Fragment);PCTP-like protein (Fragment);PCTP-like protein (Fragment);PCTP-like protein (Fragment);PCTP-like protein (Fragment);PCTP-like protein (Fragment);PCTP-like protein;PCTP-like protein	1.67828e+06	1.91353e+06	1.45638e+06	1.68273e+06	13.5855
P12109	Collagen alpha-1(VI) chain	1452410	1.6455e+06	1.48852e+06	1.52881e+06	6.71491
A0A075B6S2	Immunoglobulin kappa variable 2D-29	1.51803e+06	1368993	1.65821e+06	1.51508e+06	9.54624	+
M0R1F0;P07288	Prostate-specific antigen (Fragment);Prostate-specific antigen	1.43425e+06	1.6211e+06	1455813	1.50372e+06	6.79825	+
P08294	Extracellular superoxide dismutase [Cu-Zn]	1.48354e+06	1.53633e+06	1.42789e+06	1.48259e+06	3.65743
Q8WZ75	Roundabout homolog 4	1.4261e+06	1.58895e+06	1.39896e+06	1.47134e+06	6.98389
E7ETH0;G3XAM2;P05156	Complement factor I	1.39869e+06	1.44737e+06	1.44547e+06	1.43051e+06	1.92755
O15240	Neurosecretory protein VGF	1.45115e+06	1.18527e+06	1.60929e+06	1.41524e+06	15.141
Q9BRK3	Matrix-remodeling-associated protein 8	1.3535e+06	1.43518e+06	1.42982e+06	1.40617e+06	3.24908
P04004	Vitronectin	1.41108e+06	1.39684e+06	1.40281e+06	1.40357e+06	0.50947
P26842	CD27 antigen	1642380	1.03518e+06	1.45332e+06	1.37696e+06	22.5655
Q9UKU9	Angiopoietin-related protein 2	1.36282e+06	1.37393e+06	1.2671e+06	1.33462e+06	4.40086
O75594	Peptidoglycan recognition protein 1	1.21435e+06	1379157	1.348e+06	1.31384e+06	6.66413
P02790	Hemopexin	1.25959e+06	1.28613e+06	1.30361e+06	1.28311e+06	1.72732	+
O75882	Attractin	1.17761e+06	1.2018e+06	1.30605e+06	1228489	5.55588
P02787	Serotransferrin	1164417	1.23584e+06	1.27491e+06	1.22506e+06	4.57384	+
A0A087X0K0;P39059	Collagen alpha-1(XV) chain	1.24138e+06	1.12595e+06	1284091	1.21714e+06	6.7213
P13727	Bone marrow proteoglycan	902627	1.46789e+06	1.20112e+06	1.19054e+06	23.7522
P78324	Tyrosine-protein phosphatase non-receptor type substrate 1	1.06428e+06	1.29032e+06	1134041	1.16288e+06	9.95333
P14543	Nidogen-1	1.07859e+06	1.16864e+06	1.22932e+06	1.15885e+06	6.54433		+
P07858	Cathepsin B	1.28958e+06	1.0488e+06	1.10806e+06	1.14881e+06	10.9205
P08571	Monocyte differentiation antigen CD14	1.09258e+06	1.24569e+06	1101332	1.14653e+06	7.49924
P15144	Aminopeptidase N	1086798	1.18164e+06	1155577	1.14134e+06	4.29305
Q9HAT2	Sialate O-acetylesterase	1.13008e+06	1.14244e+06	1.10882e+06	1.12711e+06	1.50845
A0A087WWF8;F8VV13;Q96DR8	Mucin-like protein 1	1.15974e+06	1.12515e+06	1.09246e+06	1.12578e+06	2.98866
P14384	Carboxypeptidase M	1.08014e+06	1.16855e+06	1.10525e+06	1.11798e+06	4.07536
P61769	Beta-2-microglobulin	1.00318e+06	1073596	1.12276e+06	1.06651e+06	5.6356	+	+
P19835;X6R868	Bile salt-activated lipase	971950	1.13643e+06	1.07956e+06	1.06265e+06	7.86085
A0A0A0MT36	Immunoglobulin kappa variable 6D-21	1.11589e+06	1.01305e+06	1.04621e+06	1.05838e+06	4.95973	+
P33908	Mannosyl-oligosaccharide 1,2-alpha-mannosidase IA	1.04369e+06	1080218	1044998	1.0563e+06	1.96191
Q14210	Lymphocyte antigen 6D	1.052e+06	1.02377e+06	1.07326e+06	1.04968e+06	2.365
A0A075B6P5;A0A087WW87;A0A087X0Q4;P01614;P01615	Immunoglobulin kappa variable 2-28;Immunoglobulin kappa variable 2-40;Immunoglobulin kappa variable 2-40;Immunoglobulin kappa variable 2D-40;Immunoglobulin kappa variable 2D-28	1.22244e+06	980105	866192	1.02291e+06	17.7867	+
P68871	Hemoglobin subunit beta	987294	976825	925712	963277	3.4207
P27487	Dipeptidyl peptidase 4	920277	955474	949622	941791	2.00256
P02649	Apolipoprotein E	964436	945969	875184	928530	5.07386		+
Q92820	Gamma-glutamyl hydrolase	877088	1.01326e+06	886261	925537	8.22344
Q6UXG3	CMRF35-like molecule 9	980667	904291	880298	921752	5.68628
A0A1B0GV23;A0A1B0GVD5;A0A1B0GW44;A0A1B0GWE8;P07339	Cathepsin D	903061	934227	877372	904887	3.14644
Q16651	Prostasin	913897	892792	896728	901139	1.24536
Q12805	EGF-containing fibulin-like extracellular matrix protein 1	1.15151e+06	764454	784054	900006	24.2252
A0A075B6N9;A0A087WYJ9;A0A1B0GUU9;P01871	Ig mu chain C region (Fragment);Ig mu chain C region;Ig mu chain C region (Fragment);Ig mu chain C region	810258	903311	922659	878743	6.8386
P08473	Neprilysin	809313	931461	867295	869357	7.02824		+
P12830	Cadherin-1	929173	761893	869645	853570	9.93363
Q01459	Di-N-acetylchitobiase	958938	781511	815015	851821	11.0665
P10643	Complement component C7	921633	753621	873742	849665	10.187
A0A1B0GTM3;A0A1B0GUA4;A0A1B0GW68;Q13510	Acid ceramidase	780024	828032	931605	846554	9.15111
O60494	Cubilin	820444	821346	849270	830353	1.9737		+
A0A0C4DGN4;Q96DA0	Zymogen granule protein 16 homolog B	944257	742464	740787	809169	14.4583
A0A0G2JMW3;A0A0G2JP44;Q9HBB8	Cadherin-related family member 5	693852	851506	879948	808436	12.4
P08236	Beta-glucuronidase	709670	802330	806002	772667	7.06485
A0A087X1J7;P22352	Glutathione peroxidase;Glutathione peroxidase 3	731895	697911	851373	760393	10.6001
P15586	N-acetylglucosamine-6-sulfatase	754285	719630	783983	752633	4.27943
P02763	Alpha-1-acid glycoprotein 1	734612	841611	675219	750481	11.2359
A0A0G2JLV7;A0A0G2JM94;A0A0G2JMI0;A0A0G2JNK8;A0A0G2JNU6;A0A0G2JP18;A0A0G2JQ50;A0A140T8W3;Q6GTX8	Leukocyte-associated immunoglobulin-like receptor 1	895415	542744	805414	747858	24.5027
D6RD17;P01591	Immunoglobulin J chain (Fragment);Immunoglobulin J chain	739213	736643	748464	741440	0.83849
Q9NZP8	Complement C1r subcomponent-like protein	788374	664655	748747	733925	8.60812
I3L2S9;K7EPS5;P07306	Asialoglycoprotein receptor 1 (Fragment);Asialoglycoprotein receptor 1 (Fragment);Asialoglycoprotein receptor 1	726338	732216	713879	724145	1.29301
P00738	Haptoglobin	693877	794449	671438	719921	9.0997	+
P01876	Ig alpha-1 chain C region	672033	838278	638095	716135	14.9596	+
D6RF35	Vitamin D-binding protein	728215	675252	728351	710606	4.30867
C9J8Z4;Q969P0	Immunoglobulin superfamily member 8 (Fragment);Immunoglobulin superfamily member 8	655983	748390	716751	707041	6.64209
P54802	Alpha-N-acetylglucosaminidase	726456	687238	679313	697669	3.61828		+
Q9Y646	Carboxypeptidase Q	671338	752853	660184	694792	7.28142
Q9H3G5	Probable serine carboxypeptidase CPVL	722783	666003	687654	692147	4.1401
P08263	Glutathione S-transferase A1	640320	757555	678366	692080	8.64183
P42785	Lysosomal Pro-X carboxypeptidase	600737	718790	739578	686369	10.9102
P01034	Cystatin-C	592883	698257	756982	682708	12.179	+	+
P01780	Immunoglobulin heavy variable 3-7	875863	640568	516678	677703	26.9217
A0A0U1RQQ4;Q9UNN8	Endothelial protein C receptor (Fragment);Endothelial protein C receptor	623461	769520	629735	674239	12.2472
P04217	Alpha-1B-glycoprotein	669032	692882	656754	672889	2.73008
P00995	Serine protease inhibitor Kazal-type 1	708811	654046	648697	670518	4.96193
P02743	Serum amyloid P-component	688637	656649	657843	667710	2.7158
P02751	Fibronectin	593472	708700	663594	655255	8.86141	+	+
B7ZKJ8;Q14624	ITIH4 protein;Inter-alpha-trypsin inhibitor heavy chain H4	661819	693421	587184	647474	8.42528
P02671	Fibrinogen alpha chain	676593	664179	594682	645151	6.84273	+
P01861	Ig gamma-4 chain C region	632586	650180	649193	643986	1.53497	+
P17900	Ganglioside GM2 activator	725046	609541	568874	634487	12.7693
Q01974	Tyrosine-protein kinase transmembrane receptor ROR2	608479	702689	589747	633639	9.55255
G3V1C5;O95998	Interleukin 18 binding protein, isoform CRA_a;Interleukin-18-binding protein	609207	635658	633209	626025	2.33473
P51654	Glypican-3	611586	619577	611274	614146	0.766314
Q6UVK1	Chondroitin sulfate proteoglycan 4	586228	644877	595250	608785	5.1875
P10619;X6R5C5;X6R8A1	Lysosomal protective protein;Carboxypeptidase;Carboxypeptidase	587483	616697	591675	598618	2.63875
P30530	Tyrosine-protein kinase receptor UFO	610099	563982	616295	596792	4.78938
P16278	Beta-galactosidase	559633	622694	573578	585301	5.65944
Q96GW7	Brevican core protein	643355	426925	653513	574598	22.2745
P22891	Vitamin K-dependent protein Z	616057	498418	599339	571271	11.1408
Q6ZSJ9	Protein shisa-6 homolog	589063	548831	566287	568061	3.55146
P55290	Cadherin-13	590338	563352	547998	567229	3.77883
P01602	Immunoglobulin kappa variable 1-5	586119	579072	532208	565800	5.17922	+
K7EL06	CMRF35-like molecule 9	566690	516791	586867	556783	6.4789
A0A0G2JRQ6	Uncharacterized protein (Fragment)	541053	581618	545123	555931	4.01812
P07195	L-lactate dehydrogenase B chain	546967	578667	535223	553619	4.05928	+
P69905	Hemoglobin subunit alpha	558372	562223	529635	550077	3.2373
Q14118	Dystroglycan	532711	543849	561667	546076	2.67465
P06310	Immunoglobulin kappa variable 2-30	632324	471867	527630	543940	14.9764	+
Q86Y38	Xylosyltransferase 1	585027	349283	661530	531947	30.5952
P04406	Glyceraldehyde-3-phosphate dehydrogenase	544590	575091	470775	530152	10.1171
A0A087WVJ0;A0A087WWM1;A0A087X2A4;A0A0A0MRB3;A0A0A0MSH4;A0A0C4DGW3;B1AVQ7;P15941	Mucin-1 (Fragment);Mucin-1;Mucin-1;Mucin-1;Mucin-1;Mucin-1;Mucin-1;Mucin-1	514311	511732	557915	527986	4.91525	+
Q92692	Nectin-2	546962	502990	532276	527409	4.24453
P12111	Collagen alpha-3(VI) chain	524581	508846	545418	526282	3.4858		+
A0A087WWC0;A0A087WXC9;A0A087X0U8;A0A087X1F1;A0A087X1M5;Q13477	Mucosal addressin cell adhesion molecule 1	558097	489566	529734	525799	6.54899
A0A0C4DFZ2;P15289	Arylsulfatase A	555901	489003	527111	524005	6.40393
A0A075B6N8;P01860	Ig gamma-3 chain C region (Fragment);Ig gamma-3 chain C region	608614	389463	571244	523107	22.4118	+
A0A0G2JL54;A0A140TA44;F5GXS0;P0C0L5	Complement C4-B;Complement C4-A;Complement C4-B;Complement C4-B	533096	494860	531652	519869	4.16856
Q8NBJ4	Golgi membrane protein 1	527004	491004	516187	511398	3.61193
H3BP20;H3BS10;P06865	Beta-hexosaminidase;Beta-hexosaminidase;Beta-hexosaminidase subunit alpha	479227	515540	536250	510339	5.65602
Q8IYP2	Serine protease 58	294369	253624	979495	509163	80.098
A0A0B4J2B5;S4R460	Protein IGHV3OR16-9 (Fragment);Protein IGHV3OR16-9	534241	486019	479692	499984	5.96728
Q8NFZ8	Cell adhesion molecule 4	511079	442780	511255	488371	8.08461
P18065	Insulin-like growth factor-binding protein 2	456832	504581	479079	480164	4.97606
E7EMS2;G3V3D1;G3V3E8;J3KMY5;P61916	Epididymal secretory protein E1;Epididymal secretory protein E1 (Fragment);Epididymal secretory protein E1;Epididymal secretory protein E1;Epididymal secretory protein E1	528249	450781	458901	479311	8.88277
B1AP13;H7BY55;P08174	Complement decay-accelerating factor	648988	317225	468916	478376	34.7182
O00391	Sulfhydryl oxidase 1	477767	524069	423248	475028	10.6238
P07686	Beta-hexosaminidase subunit beta	430979	516754	475144	474292	9.04374
P00338	L-lactate dehydrogenase A chain	418493	516537	476200	470410	10.4755	+
P55000	Secreted Ly-6/uPAR-related protein 1	456599	333796	563442	451279	25.4643
H7BYC3;Q7KYR7	Butyrophilin subfamily 2 member A1	420877	423938	499057	447958	9.88483
P15328	Folate receptor alpha	490401	405011	437249	444220	9.70694
P30086	Phosphatidylethanolamine-binding protein 1	373119	482655	475580	443785	13.813
A0A0U1RR20;E9PLR3;J3KP74;Q92954	Proteoglycan 4;Proteoglycan 4 (Fragment);Proteoglycan 4 (Fragment);Proteoglycan 4	513991	319641	497624	443752	24.2916
P11117	Lysosomal acid phosphatase	417395	454992	457776	443388	5.08662	+
P06703;R4GN98	Protein S100-A6;Protein S100 (Fragment)	466644	399848	463636	443376	8.50893
P53990	IST1 homolog	415543	457976	449491	441003	5.09154
P61970	Nuclear transport factor 2	478932	436141	395116	436729	9.59657
G3V5V4;O43405	Cochlin (Fragment);Cochlin	467807	399373	416121	427767	8.33918
P05543	Thyroxine-binding globulin	427276	418032	437022	427444	2.22162	+
P35555	Fibrillin-1	477550	338191	461607	425782	17.9139
A0A0B4J231;B9A064	Immunoglobulin lambda-like polypeptide 5	349743	468894	455192	424609	15.3547
P23284	Peptidyl-prolyl cis-trans isomerase B	400339	435271	434879	423496	4.7358
P02750	Leucine-rich alpha-2-glycoprotein	435904	427130	404638	422557	3.81647
E7ET40	Urokinase-type plasminogen activator	419252	436046	411643	422314	2.95671
P19961	Alpha-amylase 2B	320022	478165	467945	422044	20.9697
Q8IWU5	Extracellular sulfatase Sulf-2	405255	364131	493576	420987	15.711
P31431	Syndecan-4	438507	405021	418861	420797	3.9987
P53634	Dipeptidyl peptidase 1	412132	424573	420052	418919	1.50324
E7ER45	Maltase-glucoamylase, intestinal	444675	432624	376632	417977	8.68693
P01008	Antithrombin-III	424927	407287	412542	414918	2.1829	+
P01700	Immunoglobulin lambda variable 1-47	441526	406317	396114	414652	5.74603	+
P05062	Fructose-bisphosphate aldolase B	383434	473078	361899	406137	14.5183	+
P22792	Carboxypeptidase N subunit 2	354285	459789	395078	403051	13.1998
E9PN95;P11684	Uteroglobin	444212	375675	376499	398795	9.86326
O00592	Podocalyxin	378556	415528	395967	396684	4.66281		+
J3KS82;O00182	Galectin (Fragment);Galectin-9	377390	380293	429592	395759	7.41279
P02749	Beta-2-glycoprotein 1	364835	439464	382688	395662	9.8491
A0A087X0D5;P09668	Pro-cathepsin H	391881	409168	380290	393780	3.69045
Q9H8L6	Multimerin-2	414799	358093	391292	388062	7.34174
P02766	Transthyretin	382264	355259	423492	387005	8.87912	+
D6RGG3;Q99715	Collagen alpha-1(XII) chain	455962	364928	330206	383699	16.9262
Q93088	Betaine--homocysteine S-methyltransferase 1	375870	410789	361656	382772	6.60534
P01040	Cystatin-A	430027	352432	363706	382055	10.9737
Q12860	Contactin-1	400904	378875	363490	381090	4.9346
P11279	Lysosome-associated membrane glycoprotein 1	411351	290132	441562	381015	21.0342
E9PHK0;P05452	Tetranectin	442346	327151	370248	379915	15.3199
O00241	Signal-regulatory protein beta-1	312083	470218	347911	376737	22.0086
P08572	Collagen alpha-2(IV) chain	377229	383515	359228	373324	3.37661
P26992	Ciliary neurotrophic factor receptor subunit alpha	365414	377892	372809	372038	1.68651
A8MW49;P07148	Fatty acid-binding protein, liver;Fatty acid-binding protein, liver	361733	382962	366916	370537	2.98702		+
C9JMK5;Q96FE7	Phosphoinositide-3-kinase-interacting protein 1 (Fragment);Phosphoinositide-3-kinase-interacting protein 1	380582	429285	290732	366866	19.1589
P29622	Kallistatin	325002	398321	359467	360930	10.163
G3V4U0;Q9UBX5	Fibulin-5	296700	277515	479202	351139	31.7026
P19801	Amiloride-sensitive amine oxidase [copper-containing]	328195	371424	351541	350387	6.17538
J3QSE5;P04180	Phosphatidylcholine-sterol acyltransferase (Fragment);Phosphatidylcholine-sterol acyltransferase	356025	347920	346617	350187	1.45571
P01706	Immunoglobulin lambda variable 2-11	313589	392687	338273	348183	11.623	+
A0A140T8Y3;A0A140T902;A0A140T9C0;A0A140TA33;A0A140TA41;A0A140TA52;P22105	Tenascin-X	358048	341064	342742	347285	2.69493
A0A0A0MT69	Protein IGKJ4 (Fragment)	339231	385940	316301	347157	10.223
P08582	Melanotransferrin	286487	381604	369954	346015	14.9938
P07204	Thrombomodulin	399663	299005	336250	344972	14.7528
H0Y755;M9MML0;P08637	Low affinity immunoglobulin gamma Fc region receptor III-A (Fragment);Fc of IgG low affinity IIIa receptor isoform 1;Low affinity immunoglobulin gamma Fc region receptor III-A	326030	360005	335216	340417	5.16255
O95336	6-phosphogluconolactonase	338121	347292	329446	338286	2.63817
P51884	Lumican	299789	343920	364613	336107	9.85113
Q6VUC0	Transcription factor AP-2-epsilon	336226	349293	319521	335013	4.45451
F5H7R7;Q9NR16	Scavenger receptor cysteine-rich type 1 protein M160 (Fragment);Scavenger receptor cysteine-rich type 1 protein M160	9593.12	537816	455541	334317	85.0127
P19022	Cadherin-2	398873	180628	421459	333653	39.8629
P16035	Metalloproteinase inhibitor 2	319834	311336	365712	332294	8.80274
A0A087X208;O00468	Agrin	306111	355538	327695	329781	7.51386		+
P55287	Cadherin-11	341374	307732	339788	329631	5.75857
A0A075B6I0	Immunoglobulin lambda variable 8-61	415707	458514	105765	326662	58.9281	+
O75874	Isocitrate dehydrogenase [NADP] cytoplasmic	296605	367400	315671	326559	11.2175
A0A087WV17;A0A087X0P3;A0A087X1R2;A0A0A0MR14;A0A0A0MRF2;A0A0G2JMM7;Q8IYS5	Osteoclast-associated immunoglobulin-like receptor	343643	290471	345047	326387	9.53232
P02461	Collagen alpha-1(III) chain	377973	281496	318450	325973	14.9328
P16870	Carboxypeptidase E	318602	341876	317222	325900	4.25062
Q7LBR1	Charged multivesicular body protein 1b	323511	344668	307640	325273	5.71108
O14498	Immunoglobulin superfamily containing leucine-rich repeat protein	328792	330445	307562	322266	3.95992
P80297	Metallothionein-1X	256556	280887	420737	319393	27.7417
B4DV12;F5GXK7;F5GYU3;F5H265;F5H2Z3;F5H388;F5H6Q2;F5H747;J3QKN0;J3QS39;J3QTR3;P0CG47;P0CG48;P62979;P62987;Q5PY61;Q96C32	Polyubiquitin-B;Polyubiquitin-C (Fragment);Polyubiquitin-C (Fragment);Polyubiquitin-C (Fragment);Polyubiquitin-C (Fragment);Polyubiquitin-C (Fragment);Polyubiquitin-C (Fragment);Polyubiquitin-C (Fragment);Polyubiquitin-B (Fragment);Polyubiquitin-B (Fragment);Ubiquitin-40S ribosomal protein S27a (Fragment);Polyubiquitin-B;Polyubiquitin-C;Ubiquitin-40S ribosomal protein S27a;Ubiquitin-60S ribosomal…	316861	304645	325972	315826	3.38825
A0A075B6K4	Immunoglobulin lambda variable 3-10	322467	309960	314574	315667	2.00352	+
A0A075B7D0	Protein IGHV1OR15-1 (Fragment)	317418	305927	311444	311596	1.84444
Q9UN70	Protocadherin gamma-C3	311378	300928	314304	308870	2.27663
P20933	N(4)-(beta-N-acetylglucosaminyl)-L-asparaginase	344057	320136	243814	302669	17.2975
Q14982	Opioid-binding protein/cell adhesion molecule	296898	297913	311911	302241	2.77599
Q9BZG9	Ly-6/neurotoxin-like protein 1	302816	293058	309241	301705	2.70089
Q9BRT3	Migration and invasion enhancer 1	293605	345919	264988	301504	13.6116
P26038	Moesin	307869	306221	288378	300823	3.59313
O95865	N(G),N(G)-dimethylarginine dimethylaminohydrolase 2	289498	320196	288036	299243	6.06866
Q9UBR2	Cathepsin Z	264467	317994	312145	298202	9.84604
P08185	Corticosteroid-binding globulin	335285	271205	284077	296855	11.4188
P01714	Immunoglobulin lambda variable 3-19	327185	254853	301883	294640	12.4578	+
A0A087WTA8;P08123	Collagen alpha-2(I) chain	372529	233684	270901	292371	24.5815
A0A0B4J1V0	Immunoglobulin heavy variable 3-15	278907	315555	278088	290850	7.35739
A0A0A0MSI0;Q06830	Peroxiredoxin-1 (Fragment);Peroxiredoxin-1	287911	296176	283595	289227	2.21038
A0A0C4DFY5;Q9NQ84	G-protein-coupled receptor family C group 5 member C;G-protein coupled receptor family C group 5 member C	273763	305055	287400	288740	5.43363
E7EQR4;P15311	Ezrin	297422	284504	283328	288418	2.71122
Q9UHL4	Dipeptidyl peptidase 2	269321	292497	280493	280770	4.1281
A0A0A0MSA9;A0A0C4DG49;P15151	Poliovirus receptor	273886	251138	315111	280045	11.5797
A0A087WTB6;A0A087WZE5;A2A2R6;A8MTJ3;H0Y7E8;H0Y7F4;P04899;P08754;P09471;P11488;P19087;P38405;P63092;P63096;Q5JWD1;Q5JWE9;Q5JWF2	Guanine nucleotide-binding protein G(o) subunit alpha;Guanine nucleotide-binding protein G(t) subunit alpha-2 (Fragment);Guanine nucleotide-binding protein G(s) subunit alpha isoforms short (Fragment);Guanine nucleotide-binding protein G(t) subunit alpha-3;Guanine nucleotide-binding protein G(s) subunit alpha isoforms short (Fragment);Guanine nucleotide-binding protein G(s) subunit alpha isoforms…	299451	285813	254771	280012	8.17742
Q8IV08	Phospholipase D3	278935	288132	272223	279764	2.85485
P04264	Keratin, type II cytoskeletal 1	338973	309254	186702	278310	29.0015
P02452	Collagen alpha-1(I) chain	426432	165252	221876	271187	50.6644
P80294	Metallothionein-1H	276625	227555	307943	270708	14.9678
Q5KU26	Collectin-12	252109	225264	325274	267549	19.3469
P00450	Ceruloplasmin	261006	283622	246687	263772	7.05994	+
Q96NY8	Nectin-4	264726	252969	273055	263584	3.82866
P34059	N-acetylgalactosamine-6-sulfatase	267648	252038	270752	263479	3.80648
P07711	Cathepsin L1	251999	283939	249960	261966	7.27439
Q53RD9;Q8IY13	Fibulin-7;FBLN7 protein (Fragment)	260717	265070	259413	261733	1.13178
Q96KP4	Cytosolic non-specific dipeptidase	249404	269296	258658	259119	3.84143
K4DIA0;O75144	ICOS ligand	221899	241946	313249	259031	18.5351
P16444	Dipeptidase 1	242920	237439	286970	255777	10.616
E5RHN3;Q8TDQ0	Hepatitis A virus cellular receptor 2	327895	144448	293722	255355	38.2041
P29279	Connective tissue growth factor	257665	248408	255001	253691	1.87845
P21810	Biglycan	240225	273511	243900	252545	7.22638
Q9UGT4	Sushi domain-containing protein 2	238479	277647	237845	251324	9.07146
Q6UY14	ADAMTS-like protein 4	255864	220344	275047	250418	11.0835
K7ESC2;Q9H665	IGF-like family receptor 1 (Fragment);IGF-like family receptor 1	286330	202672	259971	249658	17.1323
Q13228	Selenium-binding protein 1	216677	302210	229985	249624	18.4376
P06733	Alpha-enolase	225803	260614	250251	245556	7.27907
Q9NPG4	Protocadherin-12	302037	259424	167535	242999	28.2879
P48745	Protein NOV homolog	351475	67443.9	309414	242778	63.1413
A0A087WXM8;P50895	Basal cell adhesion molecule	254387	236551	235977	242305	4.31981
Q02487	Desmocollin-2	262898	207296	252871	241022	12.2953
M0R1L7;O43633	Charged multivesicular body protein 2a (Fragment);Charged multivesicular body protein 2a	225081	264158	232594	240611	8.61788
H0Y5E4;H0YCV9;H0YDW7;P16070	CD44 antigen (Fragment);CD44 antigen (Fragment);CD44 antigen (Fragment);CD44 antigen	324959	166869	229494	240441	33.1107
A0A0B4J1X5	Immunoglobulin heavy variable 3-74	248858	239995	232203	240352	3.46718
Q15485	Ficolin-2	223251	248423	248475	240049	6.06042
Q9UBX7	Kallikrein-11	225326	243963	247771	239020	5.02521
P21333;Q5HY54;Q60FE5	Filamin-A;Filamin-A;Filamin A	256975	219177	237587	237913	7.94452
P00747	Plasminogen	255543	220337	232569	236150	7.56885	+
P35908	Keratin, type II cytoskeletal 2 epidermal	242737	281980	179660	234792	21.9855
Q9Y624	Junctional adhesion molecule A	250634	214632	239107	234791	7.83039
P01024	Complement C3	234408	243661	223945	234005	4.2153	+	+
Q969E1	Liver-expressed antimicrobial peptide 2	175657	273672	238825	229385	21.6601
Q14515	SPARC-like protein 1	271212	173721	242829	229254	21.8723
P54760;Q96L35	Ephrin type-B receptor 4;EPH receptor B4, isoform CRA_b	208227	235240	242005	228491	7.82185
E9PKE3;P11142	Heat shock cognate 71 kDa protein	204540	271963	206596	227700	16.8408
P63104	14-3-3 protein zeta/delta	211243	226107	236314	224555	5.61457
P08118	Beta-microseminoprotein	232338	190283	248881	223834	13.4968
P51688	N-sulphoglucosamine sulphohydrolase	180406	251403	237459	223089	16.8617
Q99574	Neuroserpin	223876	215241	228632	222583	3.04987
P62736;P63267	Actin, aortic smooth muscle;Actin, gamma-enteric smooth muscle	184249	236739	246549	222512	15.0545
Q86T13	C-type lectin domain family 14 member A	221988	221850	217796	220545	1.07983
P19440	Gamma-glutamyltranspeptidase 1	218041	233485	209703	220410	5.47447	+
A0A1B0GU86;Q03154	Aminoacylase;Aminoacylase-1	219241	226967	212872	219693	3.21279
A0A075B6N7	Ig alpha-2 chain C region (Fragment)	212081	196879	248982	219314	12.217	+
A0A0A0MTJ5;Q01973	Inactive tyrosine-protein kinase transmembrane receptor ROR1	239212	201601	215489	218767	8.6936
O43505	Beta-1,4-glucuronyltransferase 1	201397	225790	221436	216208	6.01734
P04211	Immunoglobulin lambda variable 7-43	205937	227330	202411	211893	6.36395	+
Q96PD5	N-acetylmuramoyl-L-alanine amidase	203516	237457	183961	208311	12.994
P35527	Keratin, type I cytoskeletal 9	224855	215968	173309	204711	13.4606
B0YIW2;P02656	Apolipoprotein C-III	206576	204951	202506	204677	1.00095
P05413;S4R371	Fatty acid-binding protein, heart;Fatty acid-binding protein, heart (Fragment)	206632	195451	205242	202442	3.01016		+
Q9HD89	Resistin	256803	144995	200892	200897	27.8273
E9PC84;F5H7V9;J3QSU6;P24821	Tenascin	200434	176922	212080	196478	9.11526
Q07507	Dermatopontin	238345	179466	170225	196012	18.8515
A0A0C4DH43;A0A0J9YVU5	Uncharacterized protein (Fragment);Immunoglobulin heavy variable 2-70 (Fragment)	172649	211165	186272	190029	10.2777
P36955	Pigment epithelium-derived factor	180823	197230	188787	188947	4.34235
A0A087WVR1;A0A087WXJ2;A0A0C4DH07;F8WAA0;Q8N2S1	Latent-transforming growth factor beta-binding protein 4 (Fragment);Latent-transforming growth factor beta-binding protein 4 (Fragment);Latent-transforming growth factor beta-binding protein 4;Latent-transforming growth factor beta-binding protein 4 (Fragment);Latent-transforming growth factor beta-binding protein 4	187542	181235	195896	188224	3.90741
C9JVW0	Putative transmembrane protein INAFM1	153883	216110	194225	188073	16.7842
Q7Z3B1	Neuronal growth regulator 1	225932	174899	162603	187811	17.8803
A0A1B0GTB0;A0A1B0GUT7;A0A1B0GVB9;A0A1B0GVW0;A0A1B0GWJ8;A0A1C7CYW4;H7C3E1;O75787	Renin receptor (Fragment);Renin receptor;Renin receptor;Renin receptor;Renin receptor;Renin receptor;Renin receptor;Renin receptor	193292	182331	187491	187705	2.92128
E9PCT8;H0Y8T1;H7C5V0;Q16586	Alpha-sarcoglycan;Alpha-sarcoglycan (Fragment);Alpha-sarcoglycan (Fragment);Alpha-sarcoglycan	203216	160653	195883	186584	12.1952
Q13387	C-Jun-amino-terminal kinase-interacting protein 2	185158	165962	201992	184370	9.77809
Q9HB40	Retinoid-inducible serine carboxypeptidase	183113	176754	193204	184357	4.4995
Q96RW7	Hemicentin-1	154175	206285	191106	183855	14.5773
O94919	Endonuclease domain-containing 1 protein	187228	165783	198524	183845	9.04586
O75487	Glypican-4	162720	189258	195628	182535	9.56171
P19652	Alpha-1-acid glycoprotein 2	121186	197438	225048	181224	29.6846
P32119	Peroxiredoxin-2	189017	177251	174055	180108	4.37468
P98172	Ephrin-B1	166454	185217	187023	179565	6.34306
C9IYI1;E7EMS7;H7BZ95;M0R0A5	Dermokine;Dermokine;Dermokine (Fragment);Dermokine	269657	80893.5	183202	177917	53.1103
P56537	Eukaryotic translation initiation factor 6	170102	175561	187909	177857	5.12932
P40189	Interleukin-6 receptor subunit beta	187474	170368	175603	177815	4.92925
Q9ULI3	Protein HEG homolog 1	192461	143367	194186	176671	16.3328
A0A0A0MT71;Q6UX73	UPF0764 protein C16orf89	153579	195506	179627	176238	12.011
Q9NQS3	Nectin-3	218007	120850	189615	176157	28.3594
A0A087X0M8;O00533	Neural cell adhesion molecule L1-like protein	179613	192815	155966	176131	10.5998
O75339	Cartilage intermediate layer protein 1	138485	209487	180257	176077	20.2669
Q86UN3	Reticulon-4 receptor-like 2	168149	180256	178042	175483	3.67374
O14773	Tripeptidyl-peptidase 1	176736	181828	167602	175389	4.1099
P02647	Apolipoprotein A-I	162945	180047	180719	174571	5.77056	+
Q92520	Protein FAM3C	181762	169691	168357	173270	4.26154
Q9NZH0	G-protein coupled receptor family C group 5 member B	159267	175136	184310	172905	7.32748
Q03403	Trefoil factor 2	229438	97473.9	190807	172573	39.314
P00918	Carbonic anhydrase 2	165528	182706	169452	172562	5.2165
P01033;Q5H9A7;Q5H9B4;Q5H9B5	Metalloproteinase inhibitor 1;Metalloproteinase inhibitor 1;Metalloproteinase inhibitor 1 (Fragment);Metalloproteinase inhibitor 1	168531	164958	183480	172323	5.70195
P35052	Glypican-1	175439	152583	185098	171040	9.76263
Q02747	Guanylin	252176	53943	206798	170972	60.746
O43291	Kunitz-type protease inhibitor 2	196332	138542	176073	170316	17.2163
P09467	Fructose-1,6-bisphosphatase 1	168748	171982	166711	169147	1.5714
J3KSN0;J3KTR4;J3QKK2;J3QQU6;Q8WVN6	Secreted and transmembrane protein 1 (Fragment);Secreted and transmembrane protein 1 (Fragment);Secreted and transmembrane protein 1 (Fragment);Secreted and transmembrane protein 1;Secreted and transmembrane protein 1	372617	60749.6	69121	167496	106.086
A0A087WZR6;A0A087WZW4;A0A087X0T8;A0A087X105;A0A087X1W8;A0A0A0MTJ8;Q9BY67;X5DQS5	Cell adhesion molecule 1;Cell adhesion molecule 1;Cell adhesion molecule 1;Cell adhesion molecule 1;Cell adhesion molecule 1;Cell adhesion molecule 1 (Fragment);Cell adhesion molecule 1;Cell adhesion molecule 1 (Fragment)	178616	152075	169289	166660	8.07918
Q13332	Receptor-type tyrosine-protein phosphatase S	172458	172632	154793	166628	6.15096
P45877	Peptidyl-prolyl cis-trans isomerase C	159454	170059	169601	166371	3.60349
P06280	Alpha-galactosidase A	168456	162522	163535	164837	1.9255
E7EPH4	Epithelial discoidin domain-containing receptor 1 (Fragment)	145752	173575	174415	164581	9.91102
Q02818	Nucleobindin-1	171587	155514	165306	164136	4.93508
A0A0U1RR32;A0A0U1RRH7;C9J0D1;P04908;P0C0S5;P0C0S8;P16104;P20671;Q16777;Q6FI13;Q71UI9;Q7L7L0;Q8IUE6;Q93077;Q96KK5;Q96QV6;Q99878;Q9BTM1	Histone H2A;Histone H2A;Histone H2A;Histone H2A type 1-B/E;Histone H2A.Z;Histone H2A type 1;Histone H2AX;Histone H2A type 1-D;Histone H2A type 2-C;Histone H2A type 2-A;Histone H2A.V;Histone H2A type 3;Histone H2A type 2-B;Histone H2A type 1-C;Histone H2A type 1-H;Histone H2A type 1-A;Histone H2A type 1-J;Histone H2A.J	142142	193176	152836	162718	16.5401
A0A087WZM2;D6RHI9;O00584	Ribonuclease T2;Ribonuclease T2 (Fragment);Ribonuclease T2	167762	164944	152512	161739	5.01711
A0A024RCQ8;A0A0G2JH76;A0A0G2JHB6;A0A0G2JIU6;A0A0G2JK02;A0A0G2JKR3;A0A0G2JLA3;A0A0G2JLK6;A0A0G2JLL3;A0A140T8X7;A0A140T9Y1;G8JLL2;Q9UMR5	HCG1999928, isoform CRA_a;Lysosomal thioesterase PPT2;Lysosomal thioesterase PPT2 (Fragment);Lysosomal thioesterase PPT2 (Fragment);Lysosomal thioesterase PPT2 (Fragment);Lysosomal thioesterase PPT2 (Fragment);Uncharacterized protein;Lysosomal thioesterase PPT2;Uncharacterized protein;Lysosomal thioesterase PPT2;Lysosomal thioesterase PPT2 (Fragment);Lysosomal thioesterase PPT2 (Fragment);Lysosom…	165647	151118	167377	161380	5.53342
P02533;P08779	Keratin, type I cytoskeletal 14;Keratin, type I cytoskeletal 16	178093	190539	114655	161096	25.2628
Q6UXB8	Peptidase inhibitor 16	167262	152013	163072	160782	4.89979
P14174	Macrophage migration inhibitory factor	152459	182960	143867	159762	12.8594
Q96JQ0	Protocadherin-16	160524	157432	159976	159311	1.0355
P62258	14-3-3 protein epsilon	154847	156518	165726	159030	3.68366
P11021	78 kDa glucose-regulated protein	158700	157043	161310	159018	1.35281
Q9NY97	N-acetyllactosaminide beta-1,3-N-acetylglucosaminyltransferase 2	167666	168104	133628	156466	12.6413
A0A0A0MT66;P05060	Secretogranin-1 (Fragment);Secretogranin-1	207802	100438	160665	156302	34.4302
Q15375	Ephrin type-A receptor 7	168439	152547	146721	155903	7.21033
E9PDD2;P19320	Vascular cell adhesion protein 1	157190	150420	155390	154333	2.27202
P02792	Ferritin light chain	158204	145417	154669	152763	4.32227	+
C9JIZ6;P07602	Prosaposin	173332	88016.1	196314	152554	37.4035
Q96S96	Phosphatidylethanolamine-binding protein 4	147520	168898	136634	151018	10.8688
B4E1Z4	cDNA FLJ55673, highly similar to Complement factor B (EC 3.4.21.47)	161186	152869	137534	150530	7.97081
A0A087WSY6	Immunoglobulin kappa variable 3D-15	147080	152146	149675	149634	1.6929	+
P13647	Keratin, type II cytoskeletal 5	226770	106641	112708	148706	45.5081
P68104;Q5VTE0	Elongation factor 1-alpha 1;Putative elongation factor 1-alpha-like 3	142749	159468	143647	148622	6.32763
P00558	Phosphoglycerate kinase 1	142664	145960	156988	148538	5.05038
P09210	Glutathione S-transferase A2	150881	152039	142126	148349	3.65379		+
P31946	14-3-3 protein beta/alpha	133562	170939	132519	145673	15.0248
A0A0G2JPR0;A0A140TA29;A0A140TA32;A0A140TA49;P0C0L4	Complement C4-A;Complement C4-B;Complement C4-A;Complement C4-A;Complement C4-A	158943	112117	165292	145451	19.9667	+
Q9BX67	Junctional adhesion molecule C	105966	132812	194798	144525	31.5236
Q15113	Procollagen C-endopeptidase enhancer 1	157600	125078	149997	144225	11.7957
A8MTF8;P58499	Protein FAM3B	137483	144941	149619	144014	4.25015
Q99519	Sialidase-1	153089	137272	139622	143327	5.95483
F5H423;P61204;P84077	Uncharacterized protein;ADP-ribosylation factor 3;ADP-ribosylation factor 1	134624	143303	151802	143243	5.9962
A0A0J9YY99;P01768	Uncharacterized protein (Fragment);Immunoglobulin heavy variable 3-30	148515	137538	136438	140830	4.74159
P08697	Alpha-2-antiplasmin	128177	152098	141673	140650	8.52718	+
P80370	Protein delta homolog 1	157630	118725	145484	140613	14.1557
P09603	Macrophage colony-stimulating factor 1	129415	132474	158252	140047	11.3106
Q7Z7M0	Multiple epidermal growth factor-like domains protein 8	159481	141153	118253	139629	14.7937
P05937	Calbindin	137302	126408	153926	139212	9.95474		+
P10599	Thioredoxin	176197	96555.1	142935	138563	28.8684
Q9HCN6	Platelet glycoprotein VI	138526	138639	138441	138535	0.0715725
A0A087WVM2;Q8N6Q3	CD177 antigen	139452	137950	134329	137244	1.91902
P50995	Annexin A11	127110	146554	138059	137241	7.10273
P00915	Carbonic anhydrase 1	147882	131612	132213	137236	6.72207
B5A977;P20333	Soluble TNFR1B variant 1;Tumor necrosis factor receptor superfamily member 1B	132014	116851	161895	136920	16.7392
Q16832	Discoidin domain-containing receptor 2	116087	176170	117246	136501	25.1715
A0A140T9A1;A0A140T9N0	Collagen alpha-2(XI) chain;Collagen alpha-2(XI) chain (Fragment)	134980	129965	138505	134483	3.19106
E9PKT9;O96033	Molybdopterin synthase sulfur carrier subunit	112843	129127	159603	133858	17.7325
Q96IU4	Protein ABHD14B	136142	134363	129084	133196	2.75607
P03951	Coagulation factor XI	122997	136912	136911	132273	6.0737
H3BVD9;O43278	Kunitz-type protease inhibitor 1 (Fragment);Kunitz-type protease inhibitor 1	138208	129335	128995	132179	3.95203
A0A0G2JNH7;O15197	Ephrin type-B receptor 6	111226	172670	112109	132001	26.6835
P04259	Keratin, type II cytoskeletal 6B	133006	150354	112380	131913	14.4112
A0A087X1D0;H0YE23;P25942	CD40 antigen (TNF receptor superfamily member 5), isoform CRA_c;Tumor necrosis factor receptor superfamily member 5 (Fragment);Tumor necrosis factor receptor superfamily member 5	149351	102108	142762	131407	19.4713
P11047	Laminin subunit gamma-1	135521	130743	127588	131284	3.04229		+
G3V3X5;Q14767	Latent-transforming growth factor beta-binding protein 2	120225	145850	126848	130974	10.1559
O14745	Na(+)/H(+) exchange regulatory cofactor NHE-RF1	127404	131452	131751	130202	1.86472
K7EPJ4;Q8IUL8	Cartilage intermediate layer protein 2	125657	138765	125403	129942	5.88157
P06702	Protein S100-A9	154499	110274	124559	129777	17.3909
P13645	Keratin, type I cytoskeletal 10	143216	147371	96927.8	129172	21.6774
E9PIM6;E9PNQ8;J3QRJ3;P04216	Thy-1 membrane glycoprotein (Fragment);Thy-1 membrane glycoprotein (Fragment);Thy-1 membrane glycoprotein;Thy-1 membrane glycoprotein	114707	128800	142484	128664	10.7948
P30047	GTP cyclohydrolase 1 feedback regulatory protein	117019	92853	175714	128529	33.1543
C9J6L4	Carboxypeptidase (Fragment)	124413	138046	122712	128390	6.54678
G3V599;Q96PC5	Uncharacterized protein;Melanoma inhibitory activity protein 2	135228	119791	129552	128190	6.09078
P01593;P01594	Immunoglobulin kappa variable 1D-33;Immunoglobulin kappa variable 1-33	166225	119483	95414.8	127041	28.3415	+
P54753	Ephrin type-B receptor 3	125405	127969	126605	126660	1.013
H0YMD1;J3KMZ9;P01130	Low-density lipoprotein receptor;Low-density lipoprotein receptor (Fragment);Low-density lipoprotein receptor	171734	49840.5	152255	124610	52.5485
Q8WUM4	Programmed cell death 6-interacting protein	124991	122818	125785	124531	1.23369
P35754	Glutaredoxin-1	110009	169972	92905.2	124295	32.56
B1B0D4;Q86TH1	ADAMTS-like protein 2	125360	122926	124385	124224	0.986456
G3V1E2;Q9BRK5	45 kDa calcium-binding protein	126249	120979	123211	123480	2.1419
P62937	Peptidyl-prolyl cis-trans isomerase A	126573	118358	118499	121143	3.88214
P08603	Complement factor H	129278	113223	120535	121012	6.64212
P43251	Biotinidase	114705	118480	129796	120994	6.49044	+
P60174	Triosephosphate isomerase	119518	120248	119905	119890	0.304751
A0A0A0MTC8;Q9NQ36	Signal peptide, CUB and EGF-like domain-containing protein 2;Signal peptide, CUB and EGF-like domain-containing protein 2	130688	110886	117275	119616	8.44914
Q8NHP8	Putative phospholipase B-like 2	115693	128904	113503	119366	6.98035
A6NC48;Q10588	ADP-ribosyl cyclase/cyclic ADP-ribose hydrolase 2	115119	121356	118392	118289	2.63736
P21709	Ephrin type-A receptor 1	120386	112326	116826	116513	3.4668
P14618	Pyruvate kinase PKM	114989	117500	116092	116194	1.08305	+
P17050	Alpha-N-acetylgalactosaminidase	110442	125593	111969	116002	7.19101
A0A087WY73;Q16378	Proline-rich protein 4	137962	73327.8	136297	115862	31.8009
O75340	Programmed cell death protein 6	110604	126959	106933	114832	9.28424
E9PRU1;O95967	EGF-containing fibulin-like extracellular matrix protein 2	116550	112204	114733	114496	1.90623
A0A087WT99;Q9H0W9	Ester hydrolase C11orf54	112507	119826	110586	114307	4.2656
F5H5Q2;P36896	Activin receptor type-1B (Fragment);Activin receptor type-1B	148452	72891	119025	113456	33.57
P05067	Amyloid beta A4 protein	107718	119357	112206	113094	5.19018
P05109	Protein S100-A8	126630	106746	105670	113015	10.4436
P01701	Immunoglobulin lambda variable 1-51	119984	117304	101070	112786	9.07399	+
P01019	Angiotensinogen	101478	115856	121011	112782	8.97552
P51148	Ras-related protein Rab-5C	101798	118540	117815	112718	8.39574
A0A075B6H9	Immunoglobulin lambda variable 4-69	113983	107979	115243	112402	3.45329	+
Q5VW32	BRO1 domain-containing protein BROX	102000	123838	110465	112101	9.82236
A0A0U1RRC4	Endothelial protein C receptor (Fragment)	99976.1	122867	112718	111854	10.2542
A0A087WTE4;A0A087WTF6;A0A087WV75;A0A087WWD4;A0A087WX77;H7BYX6;P13591	Neural cell adhesion molecule 1	124238	98677.5	112043	111653	11.4504
A0A024R644;A0A0A0MRU5;O75503	Ceroid-lipofuscinosis neuronal protein 5	106305	112043	115328	111225	4.10581
A6NL88	Protein shisa-7	109187	115248	108220	110885	3.43488
C9J1B1;C9J6D1;C9JZI7;E9PJJ2;E9PKI2;E9PKT8;E9PNJ7;E9PNW0;E9PP22;E9PS34;Q99733	Nucleosome assembly protein 1-like 4 (Fragment);Nucleosome assembly protein 1-like 4 (Fragment);Nucleosome assembly protein 1-like 4 (Fragment);Nucleosome assembly protein 1-like 4 (Fragment);Nucleosome assembly protein 1-like 4 (Fragment);Nucleosome assembly protein 1-like 4 (Fragment);Nucleosome assembly protein 1-like 4 (Fragment);Nucleosome assembly protein 1-like 4 (Fragment);Nucleosome asse…	101195	109968	120927	110697	8.93112
P25815	Protein S100-P	119432	96426.2	116002	110620	11.2199
Q9H461	Frizzled-8	120760	102940	107889	110529	8.32233
H0Y5P1;Q5T3T9;Q6UY11	Protein delta homolog 2 (Fragment);Protein delta homolog 2;Protein delta homolog 2	118802	105269	104322	109464	7.40001
A0A0B4J1U7	Immunoglobulin heavy variable 6-1	108090	114119	105222	109144	4.16103
P06312	Immunoglobulin kappa variable 4-1	159244	86443.4	81675.3	109121	39.8394	+
Q86UD1	Out at first protein homolog	104929	109526	111050	108502	2.93651
P08519	Apolipoprotein(a)	101589	124911	98274.3	108258	13.4093	+
P22732	Solute carrier family 2, facilitated glucose transporter member 5	106906	105088	111939	107978	3.28677
Q8NCC3	Group XV phospholipase A2	94953.1	118214	109079	107415	10.9103
E5RHU3;E5RJB8;E7ESK6;E9PBI9;P34741	Syndecan-2 (Fragment);Syndecan-2 (Fragment);Syndecan;Syndecan;Syndecan-2	124109	96282.6	101528	107306	13.7793
B4DPG6;J3KPJ0;Q6P531	Gamma-glutamyltransferase 6	94553.7	124781	101892	107076	14.7246
P62820	Ras-related protein Rab-1A	106875	112611	100352	106613	5.75357
B4DPQ0;P00736	Complement C1r subcomponent	110279	109816	99631.9	106576	5.64654	+
Q14314	Fibroleukin	104029	107016	108133	106393	1.99408
A0A087WWU8;J3KN67;Q5HYB6	Tropomyosin alpha-3 chain;Tropomyosin alpha-3 chain;Epididymis luminal protein 189	178217	1882.71	138339	106146	87.1158
Q14315	Filamin-C	109471	103155	104878	105835	3.0847
P27797	Calreticulin	104080	105709	107417	105735	1.57807
E7EP32;P62873;P62879	Guanine nucleotide-binding protein G(I)/G(S)/G(T) subunit beta-2;Guanine nucleotide-binding protein G(I)/G(S)/G(T) subunit beta-1;Guanine nucleotide-binding protein G(I)/G(S)/G(T) subunit beta-2	103486	113528	99100.4	105372	7.01922
P48061	Stromal cell-derived factor 1	118335	113843	83926.9	105368	17.7512
Q9NU53	Glycoprotein integral membrane protein 1	119188	91979.3	104593	105253	12.9366
P17931	Galectin-3	107170	112915	94315.1	104800	9.08771
P09237	Matrilysin	102914	120895	90388.5	104733	14.6414
P06727	Apolipoprotein A-IV	108219	106783	96932.5	103978	5.90863
D3YTG3;H0Y897;H7C556;Q7Z7G0	Target of Nesh-SH3;Target of Nesh-SH3 (Fragment);Target of Nesh-SH3 (Fragment);Target of Nesh-SH3	115255	83288.7	109737	102760	16.6282
A0A0A0MTN3;P21266	Glutathione S-transferase;Glutathione S-transferase Mu 3	95157.4	105999	107034	102730	6.4037
Q6UX71	Plexin domain-containing protein 2	102085	111894	92981.2	102320	9.24402
Q9UIB8	SLAM family member 5	107053	93601.4	106207	102287	7.36565
O60814;P06899;P23527;P33778;P57053;P58876;P62807;Q16778;Q5QNW6;Q93079;Q99877;Q99879;Q99880;U3KQK0	Histone H2B type 1-K;Histone H2B type 1-J;Histone H2B type 1-O;Histone H2B type 1-B;Histone H2B type F-S;Histone H2B type 1-D;Histone H2B type 1-C/E/F/G/I;Histone H2B type 2-E;Histone H2B type 2-F;Histone H2B type 1-H;Histone H2B type 1-N;Histone H2B type 1-M;Histone H2B type 1-L;Histone H2B	103531	100509	101185	101742	1.55886
B1AKC9;P29323;Q6NVW1	Ephrin type-B receptor 2;Ephrin type-B receptor 2;EPHB2 protein	96803.7	104947	102757	101503	4.1519
Q9UKU6	Thyrotropin-releasing hormone-degrading ectoenzyme	128660	104938	69855.4	101151	29.2479
Q08174	Protocadherin-1	111257	89133.1	102934	101108	11.0518
D6RF86;P55285	Cadherin-6	110777	87297	104146	100740	12.0161
Q7Z4F1	Low-density lipoprotein receptor-related protein 10	95934.2	106407	99797.9	100713	5.25865
P09211	Glutathione S-transferase P	100233	92339.9	109394	100656	8.47947		+
A0A0C4DH34	Immunoglobulin heavy variable 4-28	95085.5	108642	97891.9	100540	7.11705
A0A087WV24;H7BZF7;P20711	Aromatic-L-amino-acid decarboxylase;Aromatic-L-amino-acid decarboxylase (Fragment);Aromatic-L-amino-acid decarboxylase	107830	100869	92622.6	100441	7.57954
F5GZA6;F5H0N9;F5H191;Q8IYJ0	PILR alpha-associated neural protein (Fragment);PILR alpha-associated neural protein (Fragment);PILR alpha-associated neural protein (Fragment);PILR alpha-associated neural protein	117260	85985.6	97551.2	100266	15.7708
P61626	Lysozyme C	73167	119339	108263	100257	24.0434	+
Q9P121	Neurotrimin	101090	93407.9	106199	100232	6.42342
Q9BXP8	Pappalysin-2	81292.7	113980	105200	100158	16.8904
Q9NRX4	14 kDa phosphohistidine phosphatase	115736	90478.4	94072.4	100096	13.6506
G3XAP6;P49747	Cartilage oligomeric matrix protein	104236	88399.2	107050	99895.2	10.0653
A0A0D9SG21;P24530	Endothelin B receptor (Fragment);Endothelin B receptor	109602	92523.9	95768.9	99298.1	9.13345
P01709	Immunoglobulin lambda variable 2-8	89743.8	103380	101497	98206.7	7.5242	+
P02794	Ferritin heavy chain	102090	87728.6	100757	96858.5	8.19217	+
C9JHR8;F5GZZ9;Q86VB7	Scavenger receptor cysteine-rich type 1 protein M130	130985	56756.3	102829	96856.9	38.6891
Q9UBV8	Peflin	89244.4	100165	99792.4	96400.8	6.4319
O94772	Lymphocyte antigen 6H	121324	58982	107342	95882.7	34.1175
P02748	Complement component C9	93370.6	89185.8	103539	95365.1	7.74018
Q9UHG2	ProSAAS	95073.7	97513.6	90446.9	94344.8	3.80444
F5GZH1;F5H001;F5H7N8;P78380	Oxidized low-density lipoprotein receptor 1;Oxidized low-density lipoprotein receptor 1 (Fragment);Oxidized low-density lipoprotein receptor 1 (Fragment);Oxidized low-density lipoprotein receptor 1	94991	89635.1	95192.7	93272.9	3.37945
E5RH16;E5RJ14;P09619	Platelet-derived growth factor receptor beta;Platelet-derived growth factor receptor beta (Fragment);Platelet-derived growth factor receptor beta	103169	83089.9	93444.6	93234.5	10.7698
P60953	Cell division control protein 42 homolog	85168.9	97388.9	95451.7	92669.8	7.08733
Q9NZZ3	Charged multivesicular body protein 5	98003.2	92833.9	86614.3	92483.8	6.16595
Q13145	BMP and activin membrane-bound inhibitor homolog	116719	85894.7	73253.6	91955.6	24.3132
Q06481	Amyloid-like protein 2	88217.1	97550.6	89183.8	91650.5	5.60002
F8W8W7;J3KQ45;O43493	Trans-Golgi network integral membrane protein 2	104246	76960.1	92803	91336.4	15.0017
Q9NQ38	Serine protease inhibitor Kazal-type 5	58849.3	93495.4	120281	90875.3	33.8922
H0YB34;H0YBX3;P52758	Protein RIDA (Fragment);Protein RIDA (Fragment);Ribonuclease UK114	136783	62331.7	72864.8	90659.8	44.4403
P34896	Serine hydroxymethyltransferase, cytosolic	91490.1	95561.7	84347.5	90466.5	6.27498
P15428	15-hydroxyprostaglandin dehydrogenase [NAD(+)]	87120.1	93550.1	89701.3	90123.8	3.59031
P41181	Aquaporin-2	82434.3	88791.3	98668.8	89964.8	9.09308
G5EA09;O00560	Syndecan binding protein (Syntenin), isoform CRA_a;Syntenin-1	79436.8	94869.5	92038	88781.4	9.25373
P43121	Cell surface glycoprotein MUC18	88308.6	83667.9	94320.9	88765.8	6.01721
O43866	CD5 antigen-like	106266	59606.8	98347.5	88073.5	28.3499
P12273	Prolactin-inducible protein	77843	95931.5	90385.4	88053.3	10.5244
A0A087X1T7;E7ENV9;E7EX88;H0YM81;P16112;Q6PID9	Aggrecan core protein;Aggrecan core protein;Aggrecan core protein;Aggrecan core protein;Aggrecan core protein;Aggrecan	95961.8	75006	92049	87672.3	12.7091
Q969Z4	Tumor necrosis factor receptor superfamily member 19L	85441.4	93446.6	83390	87426	6.07821
P27105	Erythrocyte band 7 integral membrane protein	99360.4	64220.9	97948.4	87176.6	22.8189
Q14914	Prostaglandin reductase 1	88471.9	87629.2	84885.5	86995.5	2.1556
K7ES75	Galectin-3-binding protein (Fragment)	77565.8	87937.2	95032.9	86845.3	10.1153
A0A0A0MSX3;A0A0G2JNZ7;Q08345	Epithelial discoidin domain-containing receptor 1	86455.6	89801.5	84033.4	86763.5	3.33825
M0QXC5;O96009	Napsin-A (Fragment);Napsin-A	93319	83572.1	83041.4	86644.2	6.67864
Q92859	Neogenin	88333.6	81083.3	88843	86086.6	5.04201
P01782	Immunoglobulin heavy variable 3-9	96521.7	91861.1	68413	85598.6	17.599
Q12794	Hyaluronidase-1	83977	79251.7	92488.1	85239	7.86945
A0A0G2JLU2;A0A0G2JM46;A0A0G2JMM1;A0A0G2JMZ3;A0A0G2JNW3;A0A0G2JPG2;A0A0G2JPI7;A0A0G2JPK5;A6NI73;O75022	Leukocyte immunoglobulin-like receptor subfamily B member 3;Leukocyte immunoglobulin-like receptor subfamily B member 3;Leukocyte immunoglobulin-like receptor subfamily B member 3;Leukocyte immunoglobulin-like receptor subfamily B member 3;Leukocyte immunoglobulin-like receptor subfamily B member 3;Leukocyte immunoglobulin-like receptor subfamily B member 3;Leukocyte immunoglobulin-like receptor …	86326.9	91106.1	78005.7	85146.2	7.78607
F8W062;P04054	Phospholipase A(2);Phospholipase A2	92939.5	84199.4	76309.4	84482.8	9.84658	+
P04279	Semenogelin-1	92652.5	65910.4	92958.9	83840.6	18.5218
P39060	Collagen alpha-1(XVIII) chain	86173.7	86620.4	78445.2	83746.4	5.48852
P13473	Lysosome-associated membrane glycoprotein 2	101338	50925.7	98625	83629.5	33.9052
F8VV56;F8VWK8;F8W022;P08962	CD63 antigen;Tetraspanin (Fragment);Tetraspanin (Fragment);CD63 antigen	80281.5	80741.3	88946.3	83323	5.85114
A0A075B6L1;A0M8Q6	Ig lambda-7 chain C region (Fragment);Ig lambda-7 chain C region	76056.8	94953.4	77967.3	82992.5	12.5341
P23470	Receptor-type tyrosine-protein phosphatase gamma	66392.5	94485.8	88061.3	82979.9	17.7391
C9IZG4;O60888	Protein CutA	78111.6	79409.3	90916.9	82812.6	8.51134
O00115	Deoxyribonuclease-2-alpha	83839.9	85954.9	77921.9	82572.2	5.04267
P09228	Cystatin-SA	60028.7	53885.7	133053	82322.3	53.4981
Q86V85	Integral membrane protein GPR180	83330.6	72925.2	89346	81867.3	10.1477
P62805	Histone H4	79310.2	89339.1	76333.8	81661	8.34411
E7EMB3;E7ETZ0;H0Y7A7;P62158	Calmodulin;Calmodulin;Calmodulin (Fragment);Calmodulin	75051.7	85272.7	83830.3	81384.9	6.79722
P01210	Proenkephalin-A	106998	44292.1	89457.1	80249.1	40.3134
Q9UM22	Mammalian ependymin-related protein 1	77795.6	86183.8	70927.1	78302.1	9.75828
Q99969	Retinoic acid receptor responder protein 2	75962.5	82575.9	76094.1	78210.8	4.83415
Q96DG6	Carboxymethylenebutenolidase homolog	75571.9	80402.8	78055.2	78010	3.09679
P00966	Argininosuccinate synthase	79576.6	78612.4	74816.2	77668.4	3.24031
P78417;Q5TA02	Glutathione S-transferase omega-1;Glutathione S-transferase omega-1 (Fragment)	64430.4	90761.4	76607.9	77266.6	17.055
B4DEB1;K7EK07;K7EMV3;K7EP01;K7ES00;P68431;P84243;Q16695;Q5TEC6;Q6NXT2;Q71DI3	Histone H3;Histone H3 (Fragment);Histone H3;Histone H3.3;Histone H3.3 (Fragment);Histone H3.1;Histone H3.3;Histone H3.1t;Histone H3;Histone H3.3C;Histone H3.2	79621	77743.2	74049.8	77138	3.67451
K7ES70;P55083	Microfibril-associated glycoprotein 4	96384.2	76358.9	57234.7	76659.3	25.537
P43652	Afamin	86778.6	69825	72396.7	76333.4	11.9695
O75351	Vacuolar protein sorting-associated protein 4B	70025.2	81077.8	77635.8	76246.3	7.41783
H0Y3Z8;H7C0Z5;Q08334	Uncharacterized protein (Fragment);Interleukin-10 receptor subunit beta (Fragment);Interleukin-10 receptor subunit beta	84660.7	67188.7	73374.1	75074.5	11.8006
P21695	Glycerol-3-phosphate dehydrogenase [NAD(+)], cytoplasmic	71438.9	82325.7	71200.4	74988.3	8.47524
K7EKL8;P05362	Intercellular adhesion molecule 1 (Fragment);Intercellular adhesion molecule 1	77608.3	70577.8	74765	74317	4.75883
Q92743	Serine protease HTRA1	84304.4	53985.2	83530	73939.9	23.3779
B9A041;P40925	Malate dehydrogenase, cytoplasmic;Malate dehydrogenase, cytoplasmic	72113.1	79113.2	70162.2	73796.2	6.37822
Q92896	Golgi apparatus protein 1	90002	47200.6	84070.8	73757.8	31.4402
J3QQR8;J3QQX6;J3QRQ1;P13598	Intercellular adhesion molecule 2 (Fragment);Intercellular adhesion molecule 2 (Fragment);Intercellular adhesion molecule 2 (Fragment);Intercellular adhesion molecule 2	59772.4	78473.6	81959.3	73401.8	16.2549
Q8WVQ1	Soluble calcium-activated nucleotidase 1	78873.7	75041.4	65597.8	73171	9.33802
P20827	Ephrin-A1	74538	70394.2	73889.3	72940.5	3.05574
B9A034;F6Q0M4;F6UPZ7;Q92956	Tumor necrosis factor receptor superfamily member 14;Tumor necrosis factor receptor superfamily member 14 (Fragment);Tumor necrosis factor receptor superfamily member 14 (Fragment);Tumor necrosis factor receptor superfamily member 14	97033.5	54162.2	67098.2	72764.6	30.221
Q8NBS9	Thioredoxin domain-containing protein 5	78963	61652.1	76944.3	72519.8	13.0526
P07996	Thrombospondin-1	80250.4	64724.8	70763.7	71913	10.883
F5H283;Q92563	Testican-2	77027.3	67708.5	70841.3	71859	6.59908
Q6PK18	2-oxoglutarate and iron-dependent oxygenase domain-containing protein 3	64320.6	72135.3	78744.5	71733.4	10.0655
C9JKG1	Biglycan (Fragment)	70698.6	71974.6	72123.3	71598.8	1.09381
Q9H6X2	Anthrax toxin receptor 1	70719.6	66409.2	75547.3	70892	6.44857
E7EN95;O75369	Filamin-B	90402.4	46676.5	75238	70772.3	31.3716
K7ELL7;P14314	Glucosidase 2 subunit beta	75585.6	63011.7	73666.6	70754.7	9.57374
P02652;V9GYE3;V9GYG9;V9GYM3	Apolipoprotein A-II;Apolipoprotein A-II;Apolipoprotein A-II (Fragment);Apolipoprotein A-II	71093.7	67927.5	72485.7	70502.3	3.3133
P11597	Cholesteryl ester transfer protein	74636	70619	66021.9	70425.6	6.1204
A2A2V1;P04156	Major prion protein (Fragment);Major prion protein	68830.6	64650.9	76792.5	70091.3	8.80022
P00441	Superoxide dismutase [Cu-Zn]	69353.7	65613.6	75017.6	69995	6.76431
Q6E0U4	Dermokine	63643.2	67161.1	79150.9	69985.1	11.6173
Q96J84	Kin of IRRE-like protein 1	73259.2	63451	72350.9	69687	7.77712
Q5SZK8	FRAS1-related extracellular matrix protein 2	69116.1	70452.5	68709.7	69426.1	1.31336
Q92673	Sortilin-related receptor	68014.5	64663.3	75290.4	69322.7	7.83722
J3KNB4;P49913	Cathelicidin antimicrobial peptide	76464.6	54575.6	76869.2	69303.2	18.4062
P50395	Rab GDP dissociation inhibitor beta	66433.4	73332.6	66952.8	68906.3	5.57583
B8PRF2;O95971	CD160 antigen	74662.8	55644.9	75755.4	68687.7	16.4638
P23526	Adenosylhomocysteinase	67415.7	74119.3	64305.6	68613.5	7.30953
K3W4U1;P06734	Low affinity immunoglobulin epsilon Fc receptor	76674.1	56644.1	71940.5	68419.6	15.301
Q9NP84	Tumor necrosis factor receptor superfamily member 12A	70785.6	49220.9	85202	68402.8	26.4733
O60568	Procollagen-lysine,2-oxoglutarate 5-dioxygenase 3	68353.2	74478.4	61341	68057.6	9.659
Q9H444	Charged multivesicular body protein 4b	67524.4	78342.2	56587.4	67484.7	16.1184
A0A075B6R9;A0A0C4DH68	Protein IGKV2D-24 (Fragment);Immunoglobulin kappa variable 2-24	74704.3	64964.3	62475.9	67381.5	9.59109
P35858	Insulin-like growth factor-binding protein complex acid labile subunit	67357.6	80443.4	54268.1	67356.3	19.4305
P30041	Peroxiredoxin-6	64641.4	63105.1	73846.9	67197.8	8.64511
G5E968;P10645	Chromogranin A (Parathyroid secretory protein 1), isoform CRA_b;Chromogranin-A	65330.1	55280.6	80870.8	67160.5	19.1972
P55259	Pancreatic secretory granule membrane major glycoprotein GP2	73276.3	58505.2	67869.2	66550.2	11.2297
Q9BYE9	Cadherin-related family member 2	80833.8	42325.7	75580.5	66246.7	31.5217
A6NNI4;G8JLH6;P21926	Tetraspanin;Tetraspanin (Fragment);CD9 antigen	60595.4	68294.5	69692.9	66194.3	7.40076
Q6V0I7	Protocadherin Fat 4	69492.7	60513.4	67727.9	65911.3	7.21771
A6QRJ1;Q15904	V-type proton ATPase subunit S1 (Fragment);V-type proton ATPase subunit S1	70050.1	62309.6	62309.7	64889.8	6.887
M0QYR6;M0R0H5;M0R0Y4;M0R1I2;M0R2E9;Q03405	Urokinase plasminogen activator surface receptor (Fragment);Urokinase plasminogen activator surface receptor (Fragment);Urokinase plasminogen activator surface receptor (Fragment);Urokinase plasminogen activator surface receptor;Urokinase plasminogen activator surface receptor (Fragment);Urokinase plasminogen activator surface receptor	92668.5	34206.7	67677.2	64850.8	45.2318
P63000	Ras-related C3 botulinum toxin substrate 1	62219.4	73490.9	58587.2	64765.8	11.999
Q9Y279	V-set and immunoglobulin domain-containing protein 4	54985.2	76925	61663	64524.4	17.4296
P11277	Spectrin beta chain, erythrocytic	57346.8	60439.7	75179	64321.8	14.8144
P15291	Beta-1,4-galactosyltransferase 1	56738.2	63499.5	71974.1	64070.6	11.915
P19021	Peptidyl-glycine alpha-amidating monooxygenase	63590.4	65069.7	63100.2	63920.1	1.60404
P04066	Tissue alpha-L-fucosidase	63976.8	54114.4	73309.9	63800.4	15.0453
A0A0A0MT26;M0R116;P05023;P13637	Sodium/potassium-transporting ATPase subunit alpha-3;Sodium/potassium-transporting ATPase subunit alpha;Sodium/potassium-transporting ATPase subunit alpha-1;Sodium/potassium-transporting ATPase subunit alpha-3	62822.8	71438.4	55726.6	63329.3	12.4242
O43895	Xaa-Pro aminopeptidase 2	61865.8	66252.8	61361.8	63160.1	4.25929
G3XAK1;P26927	Hepatocyte growth factor-like protein	59639.2	62047.4	66292	62659.5	5.37564
P31025	Lipocalin-1	52581.7	78261.6	57060.7	62634.7	21.9005
O00299	Chloride intracellular channel protein 1	67773.7	59085.2	59605	62154.6	7.84041
Q6P9A2	Polypeptide N-acetylgalactosaminyltransferase 18	60588.1	63338.7	62306.9	62077.9	2.23829
P08238	Heat shock protein HSP 90-beta	57737.2	60854.7	66884.4	61825.4	7.52156
J3KPS3;P04075	Fructose-bisphosphate aldolase;Fructose-bisphosphate aldolase A	60486.7	66847.2	57115.5	61483.2	8.03762	+
O14798	Tumor necrosis factor receptor superfamily member 10C	70837.4	44075.1	69277.7	61396.7	24.4658
Q14393	Growth arrest-specific protein 6	63522.3	75621.4	43729.9	60957.9	26.4111
E9PL83;P35318	ADM	55729.7	59432.1	66353.7	60505.2	8.91275
P05787	Keratin, type II cytoskeletal 8	64317.1	56332.3	59956.4	60201.9	6.64106
P14625	Endoplasmin	59132.5	59516.7	61238.7	59962.6	1.8706
I3L4J1;Q9UN37	Uncharacterized protein (Fragment);Vacuolar protein sorting-associated protein 4A	56553.5	66960.6	55570.4	59694.8	10.573
O76076	WNT1-inducible-signaling pathway protein 2	48243.3	63221.1	65372.1	58945.5	15.8292
Q9ULK6	RING finger protein 150	60521	50950	64983.1	58818	12.1899
Q9BTY2	Plasma alpha-L-fucosidase	57058.8	61034.7	56246.1	58113.2	4.40953
A0A087WXI2;Q9Y6R7	IgGFc-binding protein	60079	53664.9	57017.9	56920.6	5.63614
Q07075	Glutamyl aminopeptidase	58334.3	52209	59373.1	56638.8	6.83511
Q9UNW1	Multiple inositol polyphosphate phosphatase 1	50084.1	61091.2	58652.1	56609.1	10.2121
Q9C0H2	Protein tweety homolog 3	50178.9	55516.4	63968.6	56554.6	12.2947
J3KRC4;J3KSY6;Q8TCD5	5'(3')-deoxyribonucleotidase, cytosolic type;5'(3')-deoxyribonucleotidase, cytosolic type;5'(3')-deoxyribonucleotidase, cytosolic type	60816.4	54262	53585.7	56221.4	7.10364
C9JYX9;Q9UKZ9	Procollagen C-endopeptidase enhancer 2	56649.4	56076.4	55244.2	55990	1.26201
P61106;X6RFL8	Ras-related protein Rab-14;Ras-related protein Rab-14 (Fragment)	56097	58392.9	53372.9	55954.3	4.49119
E9PNS3;F2Z2Y8;Q9H0E2	Toll-interacting protein	53902.3	53446.5	60458.3	55935.7	7.01399
P31151	Protein S100-A7	53685.6	48561.7	65431.7	55893	15.4741
C9JKZ3;O15393	Transmembrane protease serine 2 (Fragment);Transmembrane protease serine 2	51228.2	71349.6	44650.9	55742.9	24.9541
P15848	Arylsulfatase B	54761	56011.9	54496.9	55089.9	1.46907
O75084;Q14332	Frizzled-7;Frizzled-2	62161.3	42697.3	60277.6	55045.4	19.5024
E9PMI0;E9PQU7;E9PR90;Q6UX15	Layilin	48314.3	58589.6	56785.7	54563.2	10.0551
Q02383	Semenogelin-2	52024.2	54502.8	56758.4	54428.5	4.35057
O00462	Beta-mannosidase	54933.5	50531	57409.7	54291.4	6.41726
Q15746	Myosin light chain kinase, smooth muscle	70805.8	31543.5	59464.6	53937.9	37.4619
Q14126	Desmoglein-2	51066.3	54879.2	54781.2	53575.5	4.05718
P48637	Glutathione synthetase	51772.5	55023.1	53498.7	53431.4	3.04373
K7ESF5;Q8IWA5	Choline transporter-like protein 2 (Fragment);Choline transporter-like protein 2	51807.1	54945.7	53287.1	53346.7	2.94331
Q08257	Quinone oxidoreductase	52898.7	56850	49905.7	53218.2	6.54501
H0YCY6;Q3LXA3	Triokinase/FMN cyclase (Fragment);Triokinase/FMN cyclase	54038.5	54764.9	50499	53100.8	4.29813
P31949	Protein S100-A11	47410.5	59287.7	52184.3	52960.8	11.2849
Q5JRA6	Melanoma inhibitory activity protein 3	54604.5	45756.3	55960.8	52107.2	10.6352
C9IZZ0;C9J4V0;C9J8S3;P51149	Ras-related protein Rab-7a (Fragment);Ras-related protein Rab-7a;Ras-related protein Rab-7a;Ras-related protein Rab-7a	51236.4	55113.3	48152.4	51500.7	6.77268
O95445;Q5SRP5	Apolipoprotein M	47103.1	57915.6	49315.8	51444.8	11.1032
P59665;P59666	Neutrophil defensin 1;Neutrophil defensin 3	31389.2	38846	81919.7	50718.3	53.7818
P22528	Cornifin-B	55126.6	47278.6	49370.9	50592.1	8.03286
P00352	Retinal dehydrogenase 1	45294.3	54190	52219.6	50568	9.23947
A0A0G2JIW1;P0DMV8;P0DMV9	Heat shock 70 kDa protein 1B;Heat shock 70 kDa protein 1A;Heat shock 70 kDa protein 1B	46637.5	49283.9	54929.7	50283.7	8.42327
P49189	4-trimethylaminobutyraldehyde dehydrogenase	47657.5	50778	51280.8	49905.5	3.93329
A0A075B6I9	Immunoglobulin lambda variable 7-46	43935.9	50632.8	54380.4	49649.7	10.657	+
O43155	Leucine-rich repeat transmembrane protein FLRT2	53746.6	46305.6	48229.7	49427.3	7.8143
P20138	Myeloid cell surface antigen CD33	55474.1	43586.8	48946.9	49335.9	12.0666
A0A087WY55;Q9NP79	Chromosome 6 open reading frame 55, isoform CRA_b;Vacuolar protein sorting-associated protein VTA1 homolog	46975.3	47687.2	53296.6	49319.7	7.02037
Q8N271	Prominin-2	49351.2	51162.5	46888.4	49134	4.36627
H3BSR6;J3QRA1;P78423	Fractalkine	46026.8	49211.4	52082.3	49106.8	6.16834
F5GZS6;J3KPF3;P08195	4F2 cell-surface antigen heavy chain	41107.2	44793.4	61313.7	49071.4	21.9295
Q8WW52	Protein FAM151A	52588.5	44863.7	49698.8	49050.3	7.95713
P61457	Pterin-4-alpha-carbinolamine dehydratase	47084.6	45110.7	54176.6	48790.6	9.77175
P02042	Hemoglobin subunit delta	60032.8	39916.7	46343.4	48764.3	21.0692
A0A1B0GX62;H3BM73;H3BMF8;H3BMY9;H3BNH4;H3BP67;H3BQ46;H3BQZ1;H3BRH0;H3BRI7;H3BRZ4;H3BS94;H3BSB8;H3BTH7;H3BUH2;H3BUU6;H3BV52;H3BVA0;H3BVD3;Q9Y653	Adhesion G-protein-coupled receptor G1 (Fragment);Adhesion G-protein-coupled receptor G1 (Fragment);Adhesion G-protein-coupled receptor G1 (Fragment);Adhesion G-protein-coupled receptor G1 (Fragment);Adhesion G-protein-coupled receptor G1 (Fragment);Adhesion G-protein-coupled receptor G1 (Fragment);Adhesion G-protein-coupled receptor G1 (Fragment);Adhesion G-protein-coupled receptor G1 (Fragment)…	42645.2	51841.1	51574.1	48686.8	10.7501
P00491	Purine nucleoside phosphorylase	44620.3	52701.3	47562.9	48294.9	8.46866
Q13621	Solute carrier family 12 member 1	44525.6	51926.4	47871.2	48107.8	7.70369
P17174	Aspartate aminotransferase, cytoplasmic	45497.3	50243.7	48101.1	47947.4	4.95737	+
Q9NP85	Podocin	47065.2	49155.6	47586.5	47935.7	2.26988		+
A0A0A0MSN4;P12821	Angiotensin-converting enzyme	50752.2	49547.3	43225.4	47841.6	8.45067	+
A0A0A0MSS8;B4DK69;H0Y804;P42330;P52895;Q04828;S4R3Z2	Aldo-keto reductase family 1 member C3;Aldo-keto reductase family 1 member C2;Aldo-keto reductase family 1 member C1 (Fragment);Aldo-keto reductase family 1 member C3;Aldo-keto reductase family 1 member C2;Aldo-keto reductase family 1 member C1;Aldo-keto reductase family 1 member C3	36824.3	59410.9	47287.3	47840.8	23.6272
P14550	Alcohol dehydrogenase [NADP(+)]	49144.7	49427.3	43991.7	47521.2	6.43907
Q14019	Coactosin-like protein	46242.7	48218.7	47790.7	47417.4	2.19237
H3BMH2;H3BSC1;P62491;Q15907	Ras-related protein Rab-11A (Fragment);Ras-related protein Rab-11A;Ras-related protein Rab-11A;Ras-related protein Rab-11B	43224	50401.5	48554	47393.2	7.86372
P25325	3-mercaptopyruvate sulfurtransferase	47516.4	48091.8	46201.5	47269.9	2.04982
P02462;P29400	Collagen alpha-1(IV) chain;Collagen alpha-5(IV) chain	48686.1	46505.2	46582.1	47257.8	2.61865
F8WCF6;H7C0A3;P59998;R4GN08	Actin-related protein 2/3 complex subunit 4;Protein ARPC4-TTLL3 (Fragment);Actin-related protein 2/3 complex subunit 4;Actin-related protein 2/3 complex subunit 4 (Fragment)	51493.3	49993.9	39847.9	47111.7	13.4472
O94910	Adhesion G protein-coupled receptor L1	44885.4	43476.7	52339.7	46900.6	10.155
Q9NUM4	Transmembrane protein 106B	41029.7	71654	27392.8	46692.2	48.5465
P18428	Lipopolysaccharide-binding protein	38916.7	41020.2	59989.4	46642.1	24.8849
H0YD37;Q9GZP0	Platelet-derived growth factor D (Fragment);Platelet-derived growth factor D	49791	50527	39262.5	46526.8	13.5446
I3L325;Q14894	Ketimine reductase mu-crystallin (Fragment);Ketimine reductase mu-crystallin	40612.5	49673	48939.5	46408.3	10.8444
A0A075B727;A0A075B728;A0A075B737;A0A075B738;P16284	Platelet endothelial cell adhesion molecule (Fragment);Platelet endothelial cell adhesion molecule (Fragment);Platelet endothelial cell adhesion molecule (Fragment);Platelet endothelial cell adhesion molecule;Platelet endothelial cell adhesion molecule	64663	26872	46204.2	45913.1	41.1586
J3QSS1;P55017	Solute carrier family 12 member 3	41653.7	52811.1	42770.1	45745	13.4329
O43490	Prominin-1	43076.2	50772.1	43092	45646.8	9.72396
Q9H6B4	CXADR-like membrane protein	47557.6	39271.5	49865.6	45564.9	12.2267
F5H442;Q99816	Tumor susceptibility gene 101 protein	45525.9	47127.5	43789.6	45481	3.67058
H3BSZ9;H3BTI0;H3BTP0;Q9H0B8	Cysteine-rich secretory protein LCCL domain-containing 2 (Fragment);Cysteine-rich secretory protein LCCL domain-containing 2;Cysteine-rich secretory protein LCCL domain-containing 2 (Fragment);Cysteine-rich secretory protein LCCL domain-containing 2	47946.1	42325.4	45131.6	45134.3	6.22662
O75936	Gamma-butyrobetaine dioxygenase	45684.8	45362.2	44081.1	45042.7	1.88319
J3KPA1;P54108	Cysteine-rich secretory protein 3	37965.6	50970.1	45866.4	44934	14.5818
Q32Q12	Nucleoside diphosphate kinase	42823.9	44541.9	47336.8	44900.9	5.07283
F5H5D3;P68363;Q71U36;Q9BQE3	Tubulin alpha chain;Tubulin alpha-1B chain;Tubulin alpha-1A chain;Tubulin alpha-1C chain	33762.4	47308.2	52826.3	44632.3	21.9787
A0A0G2JLB3;A0A0G2JNZ0;A0A0G2JNZ5;P04062	Glucosylceramidase	43491.4	43392.5	46033.6	44305.9	3.37893
O75223	Gamma-glutamylcyclotransferase	43373	44026.4	45416.9	44272.1	2.35787
H0YFN2;Q8NFJ5	Retinoic acid-induced protein 3 (Fragment);Retinoic acid-induced protein 3	44254.9	36791.3	51743	44263.1	16.8895
H0Y875;O43852	Calumenin (Fragment);Calumenin	50026.9	37663.1	43358.7	43682.9	14.1664
P01717	Immunoglobulin lambda variable 3-25	46179.5	39067.8	45574.2	43607.2	9.04177	+
P61981	14-3-3 protein gamma	15835.8	63276.1	51600.5	43570.8	56.7318
I3L0L6;I3L462;Q9H6Y7	E3 ubiquitin-protein ligase RNF167	44868.6	41987.5	43457.9	43438	3.31662
P10109	Adrenodoxin, mitochondrial	45416.2	39272.4	45156.2	43281.6	8.02771
E9PK25;G3V1A4;P23528	Cofilin-1;Cofilin 1 (Non-muscle), isoform CRA_a;Cofilin-1	31429.5	35138.6	62292.6	42953.6	39.2295		+
Q02413	Desmoglein-1	37330.7	41635.1	47990	42318.6	12.6716
O95497	Pantetheinase	42923.5	41169.3	42810.3	42301	2.3208
A0A0J9YYC8;A6XMV8;A6XMV9;P07478	Trypsin-2;Protease serine 2 preproprotein;Protease serine 2 preproprotein;Trypsin-2	45014.5	41503.6	40088.2	42202.1	6.01003
A0A0C4DH29	Immunoglobulin heavy variable 1-3	14654.9	56783.9	54782.4	42073.7	56.4878
A6NNA4;O95460	Matrilin-4	42443.5	41076.2	42466.4	41995.4	1.89579
P04792	Heat shock protein beta-1	44410.7	41143	40282.7	41945.5	5.19213
C9JXX4;P24593	Insulin-like growth factor-binding protein 5 (Fragment);Insulin-like growth factor-binding protein 5	37604.1	42538.1	44608.2	41583.5	8.6533
Q07954	Prolow-density lipoprotein receptor-related protein 1	53884.1	29273.4	41468.6	41542	29.6218
E9PL49;E9PLY4	Lysosomal Pro-X carboxypeptidase (Fragment)	31948.1	45416.6	47210.2	41525	20.0894
P40121	Macrophage-capping protein	39366.8	44174.4	40983.2	41508.1	5.8938
A0A0C4DH41;A0A0J9YWU9;P01824;P01825;P06331	Immunoglobulin heavy variable 4-61;Uncharacterized protein (Fragment);Immunoglobulin heavy variable 4-39;Immunoglobulin heavy variable 4-59;Immunoglobulin heavy variable 4-34	23383.7	60801	39562	41248.9	45.4936
D6RAR4;Q04756	Hepatocyte growth factor activator	38944.8	41533.4	42595.2	41024.4	4.57694
P51991	Heterogeneous nuclear ribonucleoprotein A3	37839	34328.4	49816.4	40661.3	19.9712
P26447	Protein S100-A4	41572.9	40526	38170.9	40089.9	4.34622
P07900	Heat shock protein HSP 90-alpha	36822.9	41892.3	40819.8	39845	6.70495
Q99523	Sortilin	41346.1	37477.4	39147.8	39323.8	4.93432
Q96PX8	SLIT and NTRK-like protein 1	40550.4	31221	45854.6	39208.6	18.8951
F8VZY9;P05783	Keratin, type I cytoskeletal 18;Keratin, type I cytoskeletal 18	44158.4	35124.4	38151.3	39144.7	11.7465
O43921	Ephrin-A2	8250.25	56797.4	51496.7	38848.1	68.5509
K7ELW0;Q99497	Protein deglycase DJ-1	36247.6	41983.1	37456.7	38562.5	7.84039
Q16706	Alpha-mannosidase 2	41843.3	34603.3	38718.4	38388.4	9.45931
B7Z6Z4;F8VPF3;F8W1I5;F8W1R7;G3V1V0;G8JLA2;J3KND3;P14649;P60660	Myosin light polypeptide 6;Myosin light polypeptide 6 (Fragment);Myosin light chain 6B;Myosin light polypeptide 6;Myosin light polypeptide 6;Myosin light polypeptide 6;Myosin light polypeptide 6;Myosin light chain 6B;Myosin light polypeptide 6	42424.9	35289.3	36598.9	38104.4	9.96875
J3KS22;J3QS36;Q7Z4W1	L-xylulose reductase (Fragment);L-xylulose reductase (Fragment);L-xylulose reductase	39963.5	37310.7	36892	38055.4	4.377
D6REB5;H0Y9B3;P35475	Alpha-L-iduronidase;Alpha-L-iduronidase (Fragment);Alpha-L-iduronidase	33024.1	28576.1	52474.3	38024.8	33.4247
Q9BUT1	3-hydroxybutyrate dehydrogenase type 2	35625.8	38709.8	39641.5	37992.3	5.53217
B1AKG0;Q03591	Complement factor H-related protein 1	40060.3	33027.2	40810.7	37966.1	11.309
B1AMW1;P19256	CD58 antigen, (Lymphocyte function-associated antigen 3), isoform CRA_c;Lymphocyte function-associated antigen 3	51353.2	20760.7	41388.1	37834	41.2403
B8ZZ73;B8ZZW4;B9A040;C9J686;C9JQ36;C9JW84;C9JWB2;F8WF92;H7BZM5;P14778	Interleukin-1 receptor type 1;Interleukin-1 receptor type 1;Interleukin-1 receptor type 1;Interleukin-1 receptor type 1 (Fragment);Interleukin-1 receptor type 1 (Fragment);Interleukin-1 receptor type 1 (Fragment);Interleukin-1 receptor type 1 (Fragment);Interleukin-1 receptor type 1;Interleukin-1 receptor type 1 (Fragment);Interleukin-1 receptor type 1	35784.7	40688.5	36193.9	37555.7	7.24469
O00322	Uroplakin-1a	27967.8	33906.8	50440.3	37438.3	31.1046
F8VYK9;P24592	Insulin-like growth factor-binding protein 6	27046.6	44540.7	40653.3	37413.5	24.5527
P82980	Retinol-binding protein 5	35035.3	39493	37161.9	37230.1	5.9887		+
P05556	Integrin beta-1	45903.6	24996.2	40719.5	37206.4	29.2622
Q9BQ51	Programmed cell death 1 ligand 2	42193.4	35006.4	34239.6	37146.5	11.8115
P37837	Transaldolase	33825.3	40833.2	36060.4	36906.3	9.69942
A0A096LP62;C9J2H1;Q86UX2	Inter-alpha-trypsin inhibitor heavy chain H5	40181.5	37190.7	33169.5	36847.2	9.54918
H7BZ94;P07237	Protein disulfide-isomerase	34982.7	37424.3	37811.3	36739.4	4.17432
P30043	Flavin reductase (NADPH)	60152.1	25281.5	24570	36667.9	55.4737
P35558	Phosphoenolpyruvate carboxykinase, cytosolic [GTP]	40199.3	35983.8	32223.1	36135.4	11.0425
Q15223	Nectin-1	32610.8	35418.7	40367.5	36132.3	10.8692
E7EUF1;Q13822	Ectonucleotide pyrophosphatase/phosphodiesterase family member 2	31300.7	39187.7	37596	36028.2	11.5763
F6TLX2;Q9HC38	Glyoxalase domain-containing protein 4	29579.8	59837.8	17211.1	35542.9	61.7004
A0A087WZR4	Low affinity immunoglobulin gamma Fc region receptor III-B	41819.5	13379.9	51265.3	35488.2	55.5686
C9JC84;C9JEU5;P02679	Fibrinogen gamma chain	34672.9	42162.8	29384.9	35406.9	18.1334	+
C9J7K9;C9J9P4;H7C5I5;O15162	Phospholipid scramblase;Phospholipid scramblase (Fragment);Phospholipid scramblase (Fragment);Phospholipid scramblase 1	35616.4	35520.2	35041.1	35392.6	0.870666
P18510	Interleukin-1 receptor antagonist protein	31705.7	25975.5	46954.6	34878.6	31.0891
I3L397;I3L504;P63241;Q6IS14	Eukaryotic translation initiation factor 5A (Fragment);Eukaryotic translation initiation factor 5A-1;Eukaryotic translation initiation factor 5A-1;Eukaryotic translation initiation factor 5A-1-like	33386.4	31982.3	39185.4	34851.4	10.9565
Q9UBI6	Guanine nucleotide-binding protein G(I)/G(S)/G(O) subunit gamma-12	30818.6	37226	36140.8	34728.4	9.87448
P11717	Cation-independent mannose-6-phosphate receptor	36630.3	32854.8	34212.6	34565.9	5.53259
B4DY26;F8VRH6;F8VVC4;F8VXZ5;F8W0K6;F8W1R9;H0YHS4;P36897	Receptor protein serine/threonine kinase;TGF-beta receptor type-1 (Fragment);TGF-beta receptor type-1 (Fragment);Receptor protein serine/threonine kinase (Fragment);TGF-beta receptor type-1 (Fragment);Receptor protein serine/threonine kinase;TGF-beta receptor type-1 (Fragment);TGF-beta receptor type-1	40173.6	25341.6	38167.8	34561	23.2833
M0QZG5;M0R0P0;Q9NNX6;X6RB12	CD209 antigen	39885.1	31298.8	31649.2	34277.7	14.1763
P04733	Metallothionein-1F	41967.9	17798.3	42456.9	34074.4	41.373
Q5JS37	NHL repeat-containing protein 3	43092.1	17790.2	40971	33951.1	41.3415
A0A1B0GTG2;A0A1B0GTJ4;A0A1B0GUA1;A0A1B0GUY0;A0A1B0GV49;A0A1B0GW77;A0A1B0GW82;P49419	Alpha-aminoadipic semialdehyde dehydrogenase;Alpha-aminoadipic semialdehyde dehydrogenase;Alpha-aminoadipic semialdehyde dehydrogenase;Alpha-aminoadipic semialdehyde dehydrogenase (Fragment);Alpha-aminoadipic semialdehyde dehydrogenase;Alpha-aminoadipic semialdehyde dehydrogenase;Alpha-aminoadipic semialdehyde dehydrogenase (Fragment);Alpha-aminoadipic semialdehyde dehydrogenase	28764.9	38144.7	34908.6	33939.4	14.0381
E9PKP4	Macrophage colony-stimulating factor 1 (Fragment)	33275.2	29177.9	39040.6	33831.2	14.6458
D6R956;D6R974;D6RE83;P09936	Ubiquitin carboxyl-terminal hydrolase;Ubiquitin carboxyl-terminal hydrolase;Ubiquitin carboxyl-terminal hydrolase;Ubiquitin carboxyl-terminal hydrolase isozyme L1	36557.1	30695.9	34190.2	33814.4	8.71997
P15259;P18669	Phosphoglycerate mutase 2;Phosphoglycerate mutase 1	34779	35135.1	31049	33654.3	6.72525
P19823;Q5T985	Inter-alpha-trypsin inhibitor heavy chain H2	33851.2	40084.5	26830.1	33588.6	19.7421
C9J7T9;P02585	Troponin C type 2 (Fast), isoform CRA_a;Troponin C, skeletal muscle	26103.7	47329.6	26919.4	33450.9	35.9518
P13796	Plastin-2	14413.6	28704.7	56659.1	33259.1	64.6074
P07737	Profilin-1	33396.3	33918.6	31526.4	32947.1	3.81765
Q9P2B2	Prostaglandin F2 receptor negative regulator	35826.1	33021.2	29873.9	32907.1	9.04903
P08183	Multidrug resistance protein 1	34265.4	29496.4	33146.5	32302.8	7.7205
B1AHL2	Fibulin-1	31387.2	33186.2	32113.1	32228.8	2.80818
Q99538	Legumain	77417.8	6549.31	10928.4	31631.8	125.545
P03973	Antileukoproteinase	18853.4	29560.4	45913.8	31442.5	43.3426
E7EPA6;G3XAI2;P07942	Laminin subunit beta-1	60777.5	13231.6	20201.7	31403.6	81.7618		+
O43707	Alpha-actinin-4	27869.4	33281.3	32611.7	31254.1	9.43984		+
P36639	7,8-dihydro-8-oxoguanine triphosphatase	27915	28792	36799.8	31168.9	15.7084
P20930	Filaggrin	41696.3	19541.6	31889.1	31042.3	35.7628
E9PCD7;H0YA68;Q9Y2E5	Alpha-mannosidase;Alpha-mannosidase (Fragment);Epididymis-specific alpha-mannosidase	28133	32131.6	32782.7	31015.8	8.11739
F8WDG7;Q13308;Q86X91	Inactive tyrosine-protein kinase 7	31615.2	30346.9	31021.8	30994.6	2.04735
P17342	Atrial natriuretic peptide receptor 3	35804.6	25730.7	31164.7	30900	16.3177
C9JA99;Q9UN75;Q9Y5H6;Q9Y5H7;Q9Y5H8;Q9Y5I0;Q9Y5I1	Protocadherin alpha-13;Protocadherin alpha-12;Protocadherin alpha-8;Protocadherin alpha-5;Protocadherin alpha-3;Protocadherin alpha-13;Protocadherin alpha-11	31942.1	39305.3	21037.8	30761.7	29.8774
A0A0A0MTI5;B8ZWD1;P07108	Acyl-CoA-binding protein	24925.2	27234.6	39852.3	30670.7	26.1973
P16152	Carbonyl reductase [NADPH] 1	30436.8	29703.7	31657.7	30599.4	3.22577
Q8N6Y2	Leucine-rich repeat-containing protein 17	31080.3	26855	33247.9	30394.4	10.6966
Q5SQ11	Prostaglandin-H2 D-isomerase (Fragment)	23834.2	36509.1	30332.8	30225.4	20.9695
P01258	Calcitonin	27552.1	26220.2	36640.4	30137.6	18.8165	+
A0A075B6Q0;E7ESV4;F5GWU8;F5GX62;F5GYB5;F5GYH7;F5H004;F5H077;F5H0B7;F5H491;F5H4H0;F5H500;F5H6R7;F5H7Y6;P61224;P62834	Ras-related protein Rap-1A (Fragment);Ras-related protein Rap-1b (Fragment);Ras-related protein Rap-1b (Fragment);Ras-related protein Rap-1b (Fragment);Ras-related protein Rap-1b;Ras-related protein Rap-1b (Fragment);Ras-related protein Rap-1b (Fragment);Ras-related protein Rap-1b (Fragment);Ras-related protein Rap-1b (Fragment);Ras-related protein Rap-1b (Fragment);Ras-related protein Rap-1b (Fr…	25968.4	23520.6	40300.7	29929.9	30.2854
F6SDV2;Q9GZM7	Tubulointerstitial nephritis antigen-like	27788.5	27027.7	34942.7	29919.6	14.5947
P08758	Annexin A5	29416.5	28680.2	31432	29842.9	4.7737
Q9BS26	Endoplasmic reticulum resident protein 44	33180.1	24890.2	31012.3	29694.2	14.4785
O75131	Copine-3	32825.5	29580.4	24609.4	29005.1	14.2669
Q6VVB1	E3 ubiquitin-protein ligase NHLRC1	18632.7	35978.6	32088.9	28900.1	31.4948
P02675	Fibrinogen beta chain	21871.3	33329.8	30355.9	28519	20.8492	+
Q8TAB3	Protocadherin-19	26476.1	30351.5	27673	28166.9	7.04496
P61586	Transforming protein RhoA	26314.3	29620.6	28175	28036.6	5.91191
Q04760	Lactoylglutathione lyase	27013.6	27370.4	29670.8	28018.3	5.1474
P04080	Cystatin-B	28906.4	23595	30372.5	27624.6	12.9086
Q99988	Growth/differentiation factor 15	23234.4	32758.7	26574.7	27522.6	17.558
P29508	Serpin B3	26003.1	25343.6	31115.6	27487.4	11.4936
H7BXI7;Q8NI32	Ly6/PLAUR domain-containing protein 6B	24250.7	26710	31093.3	27351.3	12.6725
A0A0X1KG78;K7EL21;K7ES72;Q13938	Calcyphosin;Calcyphosin;Calcyphosin (Fragment);Calcyphosin	29000	23325.2	29668.2	27331.1	12.752
Q9UEF7	Klotho	23373.8	31556.7	26971	27300.5	15.023
H0YLU2;Q06323	Proteasome activator complex subunit 1 (Fragment);Proteasome activator complex subunit 1	27277	27418.5	26458.8	27051.4	1.91502
Q15848	Adiponectin	28107.1	25291.3	27705.8	27034.7	5.63396
A8K2U0	Alpha-2-macroglobulin-like protein 1	67052.9	5164.77	8702.36	26973.3	128.849
H0YMD0;H0YMU9;H0YN42;P07355	Annexin (Fragment);Annexin;Annexin (Fragment);Annexin A2	28022.8	25519.1	26845.3	26795.8	4.6746
P22223	Cadherin-3	27854.5	22177.2	30198.8	26743.5	15.4229
P15121	Aldose reductase	25481.4	26380.1	27898.8	26586.7	4.59584
E7EQB2;E7ER44;P02788	Lactotransferrin (Fragment);Lactotransferrin;Lactotransferrin	26501	26943.9	25821.5	26422.2	2.13972
P10721	Mast/stem cell growth factor receptor Kit	26111.7	25608.5	27324.9	26348.4	3.34868
C9J1D9;Q9NPH3	Interleukin-1 receptor accessory protein (Fragment);Interleukin-1 receptor accessory protein	25817.6	25309.8	27436.4	26187.9	4.24093
E9PB58;Q6UXF1	Transmembrane protein 108	25422.9	24393.3	28704.9	26173.7	8.60315
Q8IYB8	ATP-dependent RNA helicase SUPV3L1, mitochondrial	25062	22376.2	30770.9	26069.7	16.4448
A0A0B4J1Y8	Immunoglobulin lambda variable 9-49	24262.1	27051.6	26760.5	26024.7	5.89219	+
Q99983	Osteomodulin	25068.3	27608	25332.8	26003	5.36945
P23434	Glycine cleavage system H protein, mitochondrial	24754.3	25083.6	28081.7	25973.2	7.05891
Q6UX06	Olfactomedin-4	19832.6	28603.2	29397.7	25944.5	20.4588
G3V4P8;M0QYG8;M0QYJ8;M0R0C1;M0R1D2;O60234;P60983	Glia maturation factor beta (Fragment);Glia maturation factor gamma;Glia maturation factor gamma;Glia maturation factor gamma;Glia maturation factor gamma;Glia maturation factor gamma;Glia maturation factor beta	24854.5	26300	26193.3	25782.6	3.12426
P05546	Heparin cofactor 2	26058.6	25691.4	25085.8	25611.9	1.91818
B5A958;C1KBH7;E7EU09;E9PKF2;E9PKV7;E9PN14;E9PNM3;P11362	Fibroblast growth factor receptor 1;Fibroblast growth factor receptor 1;Fibroblast growth factor receptor;Fibroblast growth factor receptor 1 (Fragment);Fibroblast growth factor receptor 1 (Fragment);Fibroblast growth factor receptor 1 (Fragment);Fibroblast growth factor receptor 1 (Fragment);Fibroblast growth factor receptor 1	28600.8	27431.6	20308.1	25446.8	17.6387
A0A087X285;B1AH90;H0Y4Y9;Q8IWY4	Signal peptide, CUB and EGF-like domain-containing protein 1;Signal peptide, CUB and EGF-like domain-containing protein 1;Signal peptide, CUB and EGF-like domain-containing protein 1 (Fragment);Signal peptide, CUB and EGF-like domain-containing protein 1	29808.9	21659.7	24835.1	25434.6	16.1494
H0YH81;P06576	ATP synthase subunit beta (Fragment);ATP synthase subunit beta, mitochondrial	30560.6	24220.8	21288.8	25356.8	18.6898
J3KTF8;J3QQX2;P52565	Rho GDP-dissociation inhibitor 1 (Fragment);Rho GDP-dissociation inhibitor 1;Rho GDP-dissociation inhibitor 1	25977.4	25163.7	24098.5	25079.9	3.75691
P19827	Inter-alpha-trypsin inhibitor heavy chain H1	15746.1	40844.2	18400.8	24997.1	55.1589
P55957	BH3-interacting domain death agonist	18041.8	27599.3	28701.6	24780.9	23.6562
F5GXC5;Q8TB96	T-cell immunomodulatory protein	27002.2	22963.4	23380.4	24448.7	9.08532
Q13591	Semaphorin-5A	28823.8	24476.8	19967.1	24422.6	18.1331
Q6UWH4	Protein FAM198B	24716.5	23780.3	24294.1	24263.6	1.93234
B5MBX2;F8WE86;P20062	Transcobalamin-2	27635.6	22397.9	22539	24190.9	12.3357
Q14117	Dihydropyrimidinase	25023.4	27952	18678.1	23884.5	19.8485
A0A0A0MSL3;G3V2F7;I3L0A0;Q13404	Ubiquitin-conjugating enzyme E2 variant 1;Ubiquitin-conjugating enzyme E2 variant 1;HCG2044781;Ubiquitin-conjugating enzyme E2 variant 1	25335.6	19011.7	26820.9	23722.8	17.4807
P27930	Interleukin-1 receptor type 2	27525.5	19653	23474.5	23551	16.7163
P35241	Radixin	24641.5	23212.8	22354.6	23403	4.93636
H0YBZ2;P04233	HLA class II histocompatibility antigen gamma chain (Fragment);HLA class II histocompatibility antigen gamma chain	32389.8	17629.3	19891.7	23303.6	34.1139
B7Z779;K7ERE2;Q96A25	Transmembrane protein 106A;Transmembrane protein 106A (Fragment);Transmembrane protein 106A	23497.2	20944.4	25126.5	23189.4	9.0902
H0YBB2;J3QT83;Q05707	Collagen alpha-1(XIV) chain (Fragment);Collagen alpha-1(XIV) chain (Fragment);Collagen alpha-1(XIV) chain	21249.1	24451.4	23223	22974.5	7.03193
Q5SW12;Q5VUB5	Protein FAM171A1 (Fragment);Protein FAM171A1	23001.2	22525.1	22694.9	22740.4	1.06101
E7ES19;P35443	Thrombospondin-4	27275.4	17338.1	23357.3	22656.9	22.0927
C9IZ46;F8WFD9;Q8N114	Protein shisa-5 (Fragment);Protein shisa-5;Protein shisa-5	44065.9	7452.67	16211.3	22576.6	84.6831
Q8IX04	Ubiquitin-conjugating enzyme E2 variant 3	21165.7	21720.6	23369.6	22085.3	5.19059
A0A075B7C0;A0A0C4DGQ5;K7EIV0;K7EKD8;P04632;U3KPR7;U3KQE2	Calpain small subunit 1 (Fragment);Calpain small subunit 1;Calpain small subunit 1 (Fragment);Calpain small subunit 1;Calpain small subunit 1;Calpain small subunit 1 (Fragment);Calpain small subunit 1 (Fragment)	28078.7	19299	18650.9	22009.5	23.9259
P20073	Annexin A7	21491.5	23140.4	19071.7	21234.6	9.63755
Q06278	Aldehyde oxidase	22308.4	21840.6	19333.2	21160.7	7.56063
A0A0A0MTS2;A0A0J9YX90;A0A0J9YXP8;A0A0J9YYH3;K7EQ48;P06744	Glucose-6-phosphate isomerase (Fragment);Glucose-6-phosphate isomerase (Fragment);Glucose-6-phosphate isomerase (Fragment);Glucose-6-phosphate isomerase (Fragment);Glucose-6-phosphate isomerase;Glucose-6-phosphate isomerase	22523.7	19839.1	20600.9	20987.9	6.59195	+
P07384	Calpain-1 catalytic subunit	20619.6	22888.8	19314.9	20941.1	8.63622
A0A140T962;A0A140T9B3;A0A140T9J9;A0A140T9M0;A0A140T9U0;A0A140T9W2;P04222;P10319;P18464;P30490;P30491;P30498;P30499;P30501;P30504;P30508;P30510;P30685;Q07000;Q29865;Q29963;Q95604	HLA class I histocompatibility antigen, Cw-6 alpha chain;HLA class I histocompatibility antigen, Cw-6 alpha chain;HLA class I histocompatibility antigen, Cw-6 alpha chain;HLA class I histocompatibility antigen, Cw-6 alpha chain;HLA class I histocompatibility antigen, Cw-6 alpha chain;HLA class I histocompatibility antigen, Cw-6 alpha chain;HLA class I histocompatibility antigen, Cw-3 alpha chain;…	20083	20652.7	22041.1	20925.6	4.81306
F8VQQ8;P61088;Q5JXB2	Ubiquitin-conjugating enzyme E2 N;Ubiquitin-conjugating enzyme E2 N;Putative ubiquitin-conjugating enzyme E2 N-like	20213.7	20445.4	21216.2	20625.1	2.54462
H3BMA1;H3BUX1;Q13421	Mesothelin (Fragment);Mesothelin (Fragment);Mesothelin	32236.3	13586.3	15599.8	20474.1	49.9946	+
A0A075B6J9	Immunoglobulin lambda variable 2-18	20311.4	14446.4	26576.4	20444.7	29.6709	+
A0A0C4DH73;P01597;P01611;P04432	Immunoglobulin kappa variable 1-12;Immunoglobulin kappa variable 1-39;Immunoglobulin kappa variable 1D-12;Immunoglobulin kappa variable 1D-39	28479.2	10421.5	20893.4	19931.4	45.4921	+
Q9BTM9	Ubiquitin-related modifier 1	24267.3	17148.7	17258.2	19558.1	20.854
A0A0B4J1R4;P32754	4-hydroxyphenylpyruvate dioxygenase	16117.6	22180.3	20243.3	19513.7	15.8683
P15529	Membrane cofactor protein	11100.1	17540.2	28756.1	19132.1	46.7016
P12104	Fatty acid-binding protein, intestinal	21552.5	15657.6	19760.5	18990.2	15.9135
Q86SR1	Polypeptide N-acetylgalactosaminyltransferase 10	15258.6	20301.5	20798.1	18786	16.3149
P54793	Arylsulfatase F	18252.3	19466.4	18559.2	18759.3	3.36526
A0A087X2B5;I3L192;P35613	Basigin (Fragment);Basigin (Fragment);Basigin	25795.7	9374.47	20970.5	18713.6	45.1013
P38606	V-type proton ATPase catalytic subunit A	15467.8	23002.1	17183.2	18551	21.2873
G3V2B9	Alpha-1-antitrypsin (Fragment)	16640.8	19918.1	19002.9	18520.6	9.1305
H3BRH7	Interleukin-4 receptor subunit alpha	16023.7	20452.3	18873.2	18449.7	12.1652
P22692	Insulin-like growth factor-binding protein 4	19324.3	18499	17259.6	18360.9	5.66011
Q9NZT1	Calmodulin-like protein 5	14095.4	9580.29	31404.1	18359.9	62.7451
A0A087WW38;Q9Y2S2	Lambda-crystallin homolog (Fragment);Lambda-crystallin homolog	20730.9	17435	16782.3	18316.1	11.5561
P25774	Cathepsin S	19794.2	17013.2	17994.3	18267.3	7.72124
P30048	Thioredoxin-dependent peroxide reductase, mitochondrial	17670	18239.5	18884.4	18264.6	3.32672
P25788	Proteasome subunit alpha type-3	19432.4	17898.4	17446.3	18259.1	5.70118
Q92484	Acid sphingomyelinase-like phosphodiesterase 3a	17083.8	16615.9	20939.4	18213	13.0274
E9PIA8;P50897	Palmitoyl-protein thioesterase 1 (Fragment);Palmitoyl-protein thioesterase 1	21706.5	14983.5	17948.9	18213	18.4993
Q496F6	CMRF35-like molecule 2	18113.4	20405.6	16084.1	18201	11.8788
P31997	Carcinoembryonic antigen-related cell adhesion molecule 8	25270.5	11653.6	17109.1	18011.1	38.0494
P31944	Caspase-14	16677.9	17694	19174.5	17848.8	7.03398
O95154;Q8NHP1	Aflatoxin B1 aldehyde reductase member 3;Aflatoxin B1 aldehyde reductase member 4	15915.1	18323.7	19114.4	17784.4	9.37011
Q9GZX9	Twisted gastrulation protein homolog 1	16769.9	12386.2	23979.6	17711.9	33.0501
P52907	F-actin-capping protein subunit alpha-1	19180.9	13527.6	20301.3	17670	20.5481
P01023	Alpha-2-macroglobulin	16715.5	19330.1	16938.7	17661.4	8.20659	+
P62993	Growth factor receptor-bound protein 2	16770.6	18651.6	17442.4	17621.6	5.40939
Q99972	Myocilin	17834.4	16258.4	18081.4	17391.4	5.68643
S4R471	Protein AMBP (Fragment)	15463.3	16705.5	19921.3	17363.4	13.2499
E5RK62;F5GY03;P09486	SPARC (Fragment);SPARC (Fragment);SPARC	16186.6	16667.9	18578.5	17144.4	7.3793
Q16698	2,4-dienoyl-CoA reductase, mitochondrial	16000.9	16645.1	18350.9	16999	7.14345
Q01469	Fatty acid-binding protein, epidermal	29183.4	8918.74	12673	16925	63.6969
P12955	Xaa-Pro dipeptidase	14404.1	17659.3	18680.2	16914.5	13.2029
P61278	Somatostatin	18886.8	13198.7	18635.5	16907	19.0095
P07357	Complement component C8 alpha chain	15024.4	16681.4	18659.6	16788.5	10.8404
Q9GZP4	PITH domain-containing protein 1	15961.9	16675.4	17423.1	16686.8	4.37883
Q14108	Lysosome membrane protein 2	13322.9	18610.9	17615.3	16516.4	17.0138
Q9UBG0	C-type mannose receptor 2	16671.2	15101	17507.6	16426.6	7.43787
P52209	6-phosphogluconate dehydrogenase, decarboxylating	20085.7	15338.9	13442.9	16289.1	21.007
O60635	Tetraspanin-1	18414.7	15334.7	15110.5	16286.6	11.3365
A0A087WYL5;H3BN26;Q6UXD5	Seizure 6-like protein 2;Seizure 6-like protein 2 (Fragment);Seizure 6-like protein 2	17381.9	14591.9	16664.2	16212.6	8.93595
P01705	Immunoglobulin lambda variable 2-23	12800	10729.1	25093.5	16207.5	47.9086	+
A0A0A6YYA0;G3V2Y2;Q9Y3B3	Protein TMED7-TICAM2;Transmembrane emp24 domain-containing protein 7 (Fragment);Transmembrane emp24 domain-containing protein 7	15823.3	7975.38	24177.7	15992.1	50.6654
Q01518	Adenylyl cyclase-associated protein 1	13800.3	12224.5	21787.9	15937.6	32.1721
B1AK87;B1AK88	Capping protein (Actin filament) muscle Z-line, beta, isoform CRA_a;Capping protein (Actin filament) muscle Z-line, beta, isoform CRA_d	15825.7	14888	16431.3	15715	4.94787
Q9Y5Y7	Lymphatic vessel endothelial hyaluronic acid receptor 1	21848	6732.62	18198.6	15593.1	50.5824
Q15365	Poly(rC)-binding protein 1	18172.4	14140.1	14219.1	15510.5	14.8647
A0A182DWH7;P49908	Protein SELENOP (Fragment);Selenoprotein P	16625.6	9446.81	19536.8	15203.1	34.159
G3V295;G3V3I1;G3V3U4;G3V5Z7;P60900	Proteasome subunit alpha type;Proteasome subunit alpha type;Proteasome subunit alpha type;Proteasome subunit alpha type;Proteasome subunit alpha type-6	15853.8	15324.5	13537.4	14905.2	8.14333
P37802;X6RJP6	Transgelin-2;Transgelin-2 (Fragment)	15136.1	14133.4	15332.6	14867.4	4.32622
C9JFR7;P99999	Cytochrome c (Fragment);Cytochrome c	15648.5	15107.6	13029.5	14595.2	9.47318
H3BQB1;H3BQF1;P07741	Adenine phosphoribosyltransferase (Fragment);Adenine phosphoribosyltransferase (Fragment);Adenine phosphoribosyltransferase	11593.5	15990.3	16138.9	14574.3	17.7193
P81605	Dermcidin	15597.2	18629.9	9206.11	14477.7	33.2276
Q08830	Fibrinogen-like protein 1	13924.3	14089.8	15333.4	14449.2	5.33053
E9PRA7;Q96HD9	N-acyl-aromatic-L-amino acid amidohydrolase (carboxylate-forming)	15955.6	11690	15064.5	14236.7	15.8046
Q8N8Z6	Discoidin, CUB and LCCL domain-containing protein 1	10212.5	19475.8	12654.6	14114.3	34.0156
P02741;Q5VVP7	C-reactive protein	13129.9	14489.2	14084.6	13901.2	5.0206	+
P52823	Stanniocalcin-1	14459	14079.7	12737.9	13758.9	6.57262
P13284	Gamma-interferon-inducible lysosomal thiol reductase	20302.8	2178.5	18487.6	13656.3	73.0902
Q9Y6Q6	Tumor necrosis factor receptor superfamily member 11A	17723.8	7428.31	15178.4	13443.5	39.8894
A0A0A0MS15	Immunoglobulin heavy variable 3-49	12505.5	15086.3	12711.4	13434.4	10.6761
C9JJP5;C9JTY3;C9JUE0;Q92734	Protein TFG (Fragment);Protein TFG (Fragment);Protein TFG (Fragment);Protein TFG	13675.3	13519.7	12321.2	13172.1	5.62525
G3V4N7;P12277	Creatine kinase B-type (Fragment);Creatine kinase B-type	12328.3	9992.72	16804.7	13041.9	26.5422	+
P36957;Q86SW4	Dihydrolipoyllysine-residue succinyltransferase component of 2-oxoglutarate dehydrogenase complex, mitochondrial;Dihydrolipoamide acetyltransferase component of pyruvate dehydrogenase complex (Fragment)	14701.2	6109.45	17429.7	12746.8	46.3472
P27987	Inositol-trisphosphate 3-kinase B	15630.9	11369.6	11222.4	12741	19.6518
A0A0B4J1V2	Immunoglobulin heavy variable 2-26	11398.5	13612.8	12365.2	12458.8	8.91027
P62328	Thymosin beta-4	13488	10084.9	13474.8	12349.3	15.8795
Q9BRA2	Thioredoxin domain-containing protein 17	14475.3	8552.28	13863.5	12297.1	26.4898
B5MCX6;F8W8J5;Q8TAG5	V-set and transmembrane domain-containing protein 2A	12746.5	11278	12844.7	12289.7	7.14052
E9PG08;Q9UGM5	Fetuin-B	10053.3	10488.1	16279	12273.5	28.3186
C9JCU0;C9JM33;C9K067;F8WDE1;P48551	Interferon alpha/beta receptor 2 (Fragment);Interferon alpha/beta receptor 2 (Fragment);Interferon alpha/beta receptor 2;Interferon alpha/beta receptor 2;Interferon alpha/beta receptor 2	14079.3	8898.28	13052.8	12010.1	22.8423
H7C4C8;P50990	T-complex protein 1 subunit theta (Fragment);T-complex protein 1 subunit theta	13444	10444.4	11257.2	11715.2	13.2423
A0A0J9YX35	Uncharacterized protein (Fragment)	13281.1	10140.3	11050.6	11490.7	14.0633
Q9BYF1	Angiotensin-converting enzyme 2	10012.4	13012.4	11370.6	11465.1	13.1025
Q9Y376	Calcium-binding protein 39	11201.1	11526.1	11568.8	11432	1.75885
P55268	Laminin subunit beta-2	10253.7	8323.48	15038.3	11205.1	30.8523		+
Q86YZ3	Hornerin	6442.35	12571.4	14253.5	11089.1	37.0738
P19013	Keratin, type II cytoskeletal 4	12698.2	14924.3	5423.29	11015.3	45.1107
A0A0C4DFU1;A0A0C4DFU2;A0A0C4DG56;P04179	Superoxide dismutase;Superoxide dismutase;Superoxide dismutase;Superoxide dismutase [Mn], mitochondrial	8724.45	11608.7	12656.5	10996.6	18.5172
P14780	Matrix metalloproteinase-9	14989.5	8824.09	9146.69	10986.8	31.5856
O15204	ADAM DEC1	11344.6	5174.52	16327.6	10948.9	51.0286
D6R9C5	Osteopontin (Fragment)	11540	8088.59	12314.1	10647.6	21.1285
A0A0C4DGE4;A0A0J9YW33;Q13277	Syntaxin-3 (Fragment);Syntaxin-3;Syntaxin-3	12413.1	9178.26	10296	10629.1	15.457
P01031	Complement C5	9204.82	11800.5	10541.8	10515.7	12.3436	+
Q96P63	Serpin B12	10958	8688.02	11550.1	10398.7	14.5286
G3XAL0;P40926	Malate dehydrogenase;Malate dehydrogenase, mitochondrial	9635.22	11007.9	9894.45	10179.2	7.16459
P30050	60S ribosomal protein L12	9191.59	9636.34	11392.2	10073.4	11.5512
P20160	Azurocidin	10125.4	9527.01	10302.4	9984.94	4.06938
P13716	Delta-aminolevulinic acid dehydratase	11030.4	9033.04	9685.92	9916.44	10.27
P07437;P68371;Q13885;Q5JP53;Q5ST81;Q9BVA1	Tubulin beta chain;Tubulin beta-4B chain;Tubulin beta-2A chain;Tubulin beta chain;Tubulin beta chain;Tubulin beta-2B chain	9011.68	9801.3	10797.1	9870.04	9.06496
O75368	SH3 domain-binding glutamic acid-rich-like protein	9312.04	9914.59	10153.9	9793.49	4.42924
P08246	Neutrophil elastase	10257.9	11701.7	7305.62	9755.08	22.9703
C9JGI3;P19971	Thymidine phosphorylase (Fragment);Thymidine phosphorylase	13632.7	4772.13	9904.66	9436.49	47.1446
P30101	Protein disulfide-isomerase A3	13558.4	9916.35	4654.98	9376.57	47.7379
P30740	Leukocyte elastase inhibitor	10335.4	8661.18	8808.71	9268.43	10.0012
A0A087WTK0;A0A087WVC6;Q12913	Receptor-type tyrosine-protein phosphatase eta	9326.78	9883.57	8423.84	9211.39	7.99743
E5RGN3;E5RIM7;O00244	Copper transport protein ATOX1	10771.9	7955.24	8673.57	9133.58	16.0245
C9JIF9;H7C1U0;P13798	Acylamino-acid-releasing enzyme;Acylamino-acid-releasing enzyme (Fragment);Acylamino-acid-releasing enzyme	6837.49	9586.74	10664.5	9029.57	21.8548
Q15274	Nicotinate-nucleotide pyrophosphorylase [carboxylating]	8818.72	8920.4	8909.39	8882.84	0.628194
P02511	Alpha-crystallin B chain	10479.8	4827.79	10487.3	8598.28	37.9767
A6XND0;A6XND1;B3KWK7;C9JMX4;H0Y5K2;P17936	Insulin-like growth factor binding protein 3;Insulin-like growth factor binding protein 3 isoform b;Insulin-like growth factor binding protein 3, isoform CRA_b;Insulin-like growth factor-binding protein 3 (Fragment);Insulin-like growth factor-binding protein 3 (Fragment);Insulin-like growth factor-binding protein 3	11936.2	3999.85	9291.29	8409.11	48.0556	+
F8VY04;F8VZG5;F8W1A4;G3V213;P54819	Adenylate kinase 2, mitochondrial;Adenylate kinase 2, mitochondrial;Adenylate kinase 2, mitochondrial;Adenylate kinase 2, isoform CRA_a;Adenylate kinase 2, mitochondrial	6618.57	4785.38	13496.1	8300	55.3291
A0A075B6S6	Immunoglobulin kappa variable 2D-30	7379.66	9265.67	7920.1	8188.48	11.8609	+
P10809	60 kDa heat shock protein, mitochondrial	8248.16	10725.5	4252.16	7741.94	42.1887
A6NHG4;B5MC82;J3KQ18;P30046	D-dopachrome decarboxylase-like protein;D-dopachrome decarboxylase;D-dopachrome decarboxylase;D-dopachrome decarboxylase	7163.95	8253.61	7675.48	7697.68	7.08227
P80188;X6R8F3	Neutrophil gelatinase-associated lipocalin	18830.3	2129.83	2130.73	7696.94	125.267		+
Q96A22	Uncharacterized protein C11orf52	6735.23	9688.15	6569.26	7664.21	22.8953
A0A0B4J2C3;P13693;Q5W0H4	Translationally-controlled tumor protein	7709.4	7629.96	7473.57	7604.31	1.57795
Q9Y6X5	Bis(5'-adenosyl)-triphosphatase ENPP4	7877.4	8129.3	6537.3	7514.67	11.3876
Q5T2L0;Q7Z7D3	V-set domain-containing T-cell activation inhibitor 1	5223.94	9067.31	6382.75	6891.33	28.6086
F5H6T1;P61160	ARP2 actin-related protein 2 homolog (Yeast), isoform CRA_d;Actin-related protein 2	7392.22	7424.52	5382.73	6733.16	17.3709
P04040	Catalase	6941.06	4509.72	8106.94	6519.24	28.1525
A0A0B4J1R6;P29401	Transketolase	6184.23	7206.15	5756.35	6382.24	11.6715
Q9ULC0	Endomucin	15401.4	2549.68	1180.83	6377.32	123.015
F5H2R5;F5H3P3;F5H6Q0;H0YGX7;P52566	Rho GDP-dissociation inhibitor 2 (Fragment);Rho GDP-dissociation inhibitor 2 (Fragment);Rho GDP-dissociation inhibitor 2 (Fragment);Rho GDP-dissociation inhibitor 2 (Fragment);Rho GDP-dissociation inhibitor 2	2956.49	9952.54	5939.25	6282.76	55.8775
P47914	60S ribosomal protein L29	5533.47	5746.73	7229.3	6169.83	14.9713
P22314;Q5JRR6	Ubiquitin-like modifier-activating enzyme 1	5961.25	6171.28	6216.83	6116.46	2.22886
A0A0C4DGB5;B7Z574;E7EQK6;E7ES10;E7EVY3;E9PCH5;E9PSG1;F8W7E0;H0Y944;H0YA91;P20810	Calpastatin;Calpastatin;Calpastatin (Fragment);Calpastatin (Fragment);Calpastatin;Calpastatin;Calpastatin (Fragment);Calpastatin (Fragment);Calpastatin (Fragment);Calpastatin (Fragment);Calpastatin	6817.32	4570.53	6305.67	5897.84	19.9668
Q9Y6W3	Calpain-7	3762.51	6590.98	6734.29	5695.93	29.4231
J3QL71;J3QQM9;J3QR84;J3QRJ1;Q96FV2	Secernin-2;Secernin-2 (Fragment);Secernin-2 (Fragment);Secernin-2;Secernin-2	5465.77	4107.4	7016.72	5529.96	26.3243
D6RA82;P12429	Annexin;Annexin A3	5010.84	5526.95	5871.24	5469.67	7.91724
P02775	Platelet basic protein	8318.68	4237.2	3600	5385.3	47.5422	+
Q9BRF8	Serine/threonine-protein phosphatase CPPED1	5299.77	5297.15	5469.15	5355.36	1.84032
Q6P4A8	Phospholipase B-like 1	5303.13	5125.67	5636.34	5355.05	4.84152
B0YJC4;P08670	Vimentin	4754.66	5272.71	5211.03	5079.46	5.571
Q07021	Complement component 1 Q subcomponent-binding protein, mitochondrial	4682.18	4098.76	6088.29	4956.41	20.6343
F5H4M7;G3V1J9;Q9Y3Q3	Transmembrane emp24 domain-containing protein 3	6527.3	1800.94	6131.03	4819.76	54.3983
P98095	Fibulin-2	4871.58	3503.23	5027.2	4467.34	18.7708
P14138;Q4FAT2	Endothelin-3;Endothelin 3	6332.91	3277.38	3750.56	4453.62	36.9278
P02545;Q3BDU5	Prelamin-A/C	4570.04	4059.7	4459.47	4363.07	6.15346
A0A087WUI2;P22626	Heterogeneous nuclear ribonucleoproteins A2/B1	4027.35	4640.62	4083.54	4250.5	7.97591
P61978;Q5T6W2	Heterogeneous nuclear ribonucleoprotein K;Heterogeneous nuclear ribonucleoprotein K (Fragment)	3319.06	4221.08	3799.7	3779.94	11.9402
P22531;P22532;P35325;P35326;Q96RM1;Q9BYE4	Small proline-rich protein 2E;Small proline-rich protein 2D;Small proline-rich protein 2B;Small proline-rich protein 2A;Small proline-rich protein 2F;Small proline-rich protein 2G	6360.32	1946.93	2655.9	3654.38	64.8555
C9J6K0;Q13103	Secreted phosphoprotein 24 (Fragment);Secreted phosphoprotein 24	3537.46	2576.06	4253.95	3455.82	24.3623
Q09666	Neuroblast differentiation-associated protein AHNAK	3108.4	4512.29	2309.25	3309.98	33.6941
Q15084	Protein disulfide-isomerase A6	3128.88	2460.7	3879.67	3156.42	22.4903
Q9Y6V0	Protein piccolo	3588.6	3137.01	2268.23	2997.95	22.3846
G5E9F8;P07225	Protein S (Alpha), isoform CRA_b;Vitamin K-dependent protein S	2539.62	2825.48	3351.29	2905.46	14.17	+
P13671	Complement component C6	2542.95	3070.06	2984.31	2865.77	9.86967
F5GWF6;F8VQ14;P78371	T-complex protein 1 subunit beta	3083.81	2743.44	2237.06	2688.11	15.8505
P04083	Annexin A1	2383.12	3187.86	2372.75	2647.91	17.6606
H0YBG6;P38646	Stress-70 protein, mitochondrial (Fragment);Stress-70 protein, mitochondrial	2344.65	3581.45	1928.23	2618.11	32.843
K7ERG9;P00746	Complement factor D	1106.21	2523.1	4151.37	2593.56	58.7533
P29034;Q5RHS7	Protein S100-A2	1622.19	2158.74	2635.75	2138.89	23.7073
P49788	Retinoic acid receptor responder protein 1	1370.62	2040.38	1831.51	1747.5	19.6102
